# Supplementary material for: Construction of hierarchically chiral metal–organic frameworks for fast and mild asymmetric catalysis
Source: Royal Society of Chemistry journal article supplement (doi:10.1039/d3gc02521g), 2023-01-01
Supplement: d3gc02521g1.pdf [file d3gc02521g1.pdf]

## Electronic Supplementary Materials

# **Construction of Hierarchically Chiral Metal–Organic Frameworks for Fast and Mild Asymmetric Catalysis**

Zahra Sharifzadeh‡, Sayed Ali Akbar Razavi, ‡ and Ali Morsali \*

Department of Chemistry, Faculty of Sciences, Tarbiat Modares University, P.O. Box 14117-13116, Tehran, Islamic Republic of Iran

‡ These two authors contributed equally in this work.

**Section S1. Materials and Methods.** All starting materials for the synthesis were purchased from commercial providers and used without further purification (Sigma-Aldrich, Merck and the others). **FT-IR** spectra were recorded using a Nicolet Fourier Transform IR, Nicolet 100 spectrometer in the range 400-4000  $\text{cm}^{-1}$  using the KBr disk technique. X-ray powder diffraction (**PXRD**) measurements were performed using a Philips X'pert diffractometer with monochromated  $\text{Cu-K}\alpha$  ( $\lambda=1.54056 \text{ \AA}$ ) radiation. The  $\text{N}_2$  adsorption/desorption isotherm was measured at 77 K using a Micromeritics ASAP 2020 analyzer. The specific surface area was calculated by the Brunauer-Emmett-Teller (**BET**) method. The samples were characterized with scanning electron microscopy (**SEM**) ZEISS SIGMA VP (Germany) with gold coating. The samples were characterized using energy dispersive X-ray spectroscopy (**EDAX**) on a CamScan MV2300 instrument with gold coating. Echrom **GC A90** gas chromatography with a flame-ionization detector (China) was employed (Agilent HP-5 capillary column,  $30 \text{ m} \times 0.320 \text{ mm} \times 0.25 \text{ }\mu\text{m}$ , temperature limits from  $60 \text{ }^\circ\text{C}$  to  $325 \text{ }^\circ\text{C}$ ) for the symmetric reactions products. For determining the enantiomeric excess (ee), a **chiral column** was used (Agilent CYCLODEX-B capillary column,  $30 \text{ m} \times 0.25 \text{ mm} \times 0.25 \text{ }\mu\text{m}$ , temperature limits from  $50 \text{ }^\circ\text{C}$  to  $230 \text{ }^\circ\text{C}$ ).

Section S2. Structural Characterization

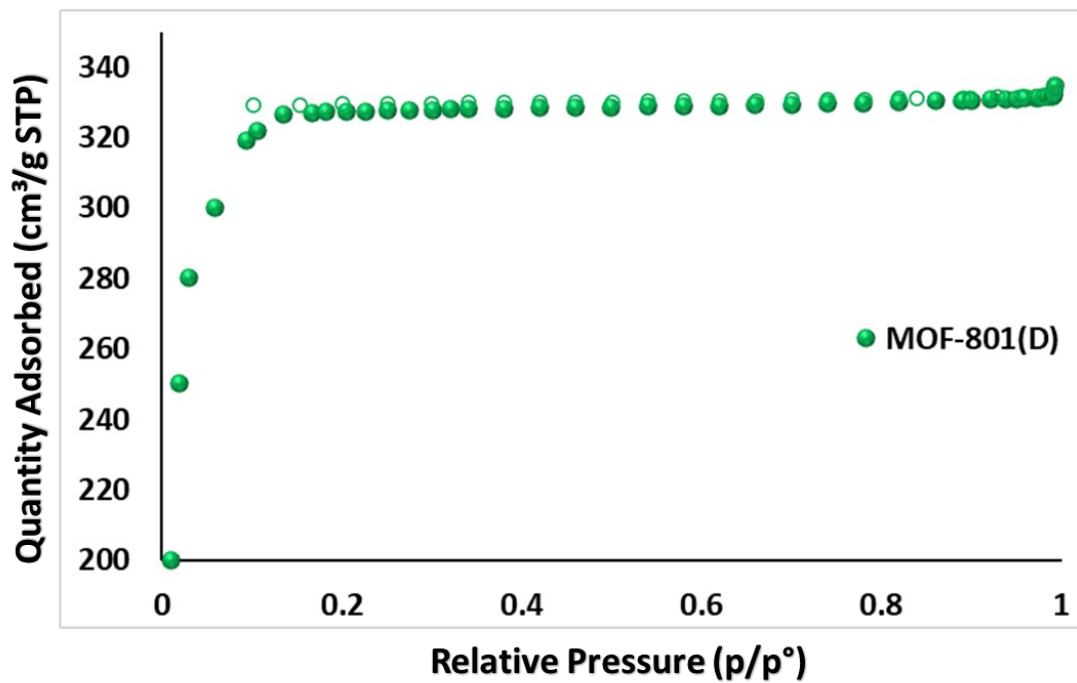

Figure S1. N<sub>2</sub> sorption isotherms of MOF-801(D) at 77 K.

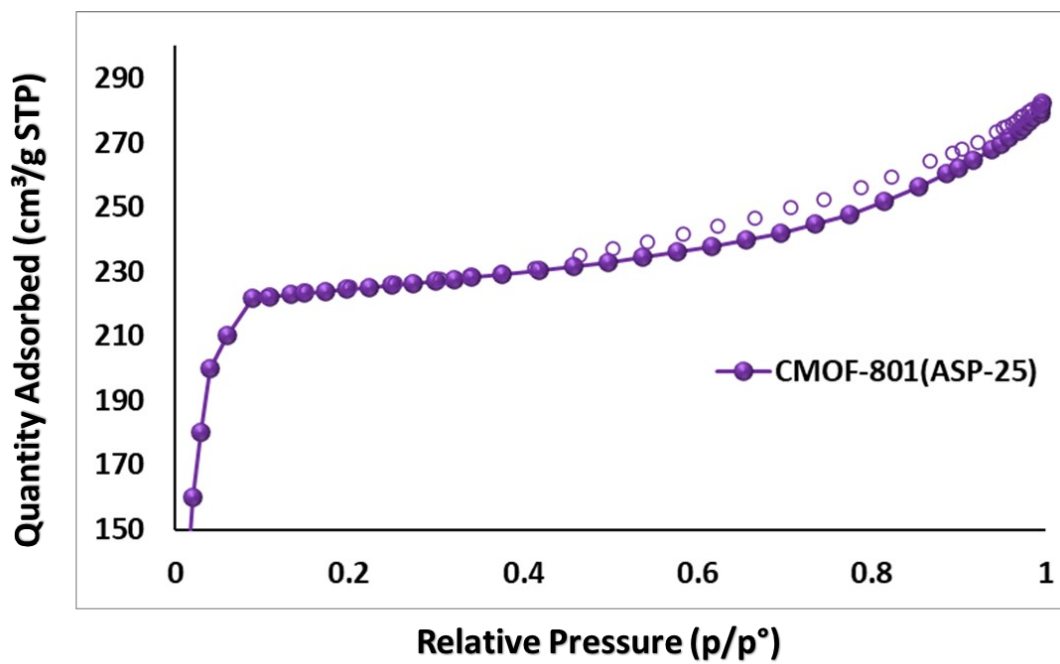

**Figure S2.** N<sub>2</sub> sorption isotherms of CMOF-801(ASP-25) at 77 K, showing hysteresis loop.

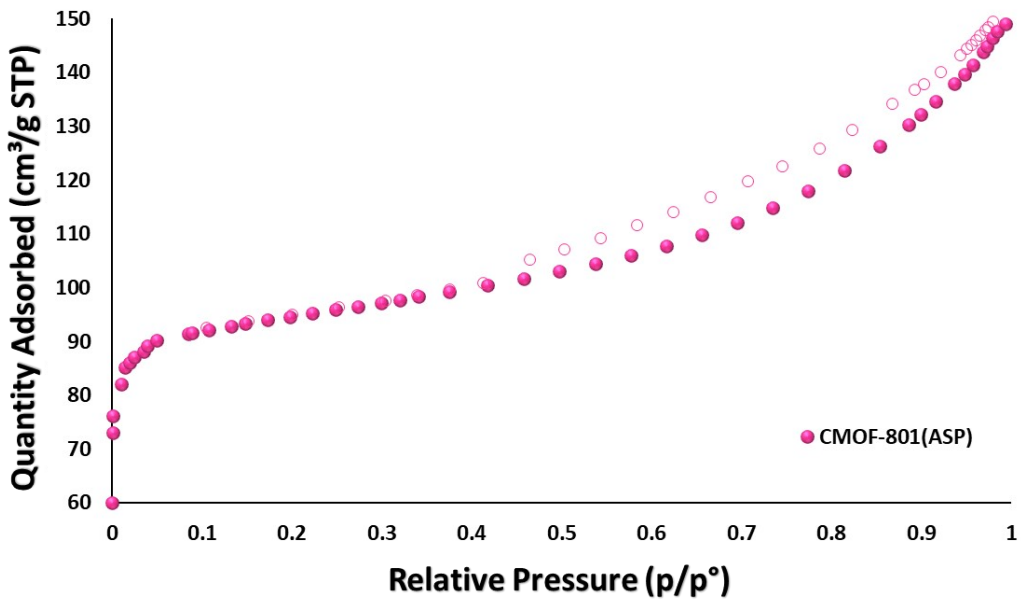

**Figure S3.** N<sub>2</sub> sorption isotherms of CMOF-801(ASP) at 77 K, showing hysteresis loop.

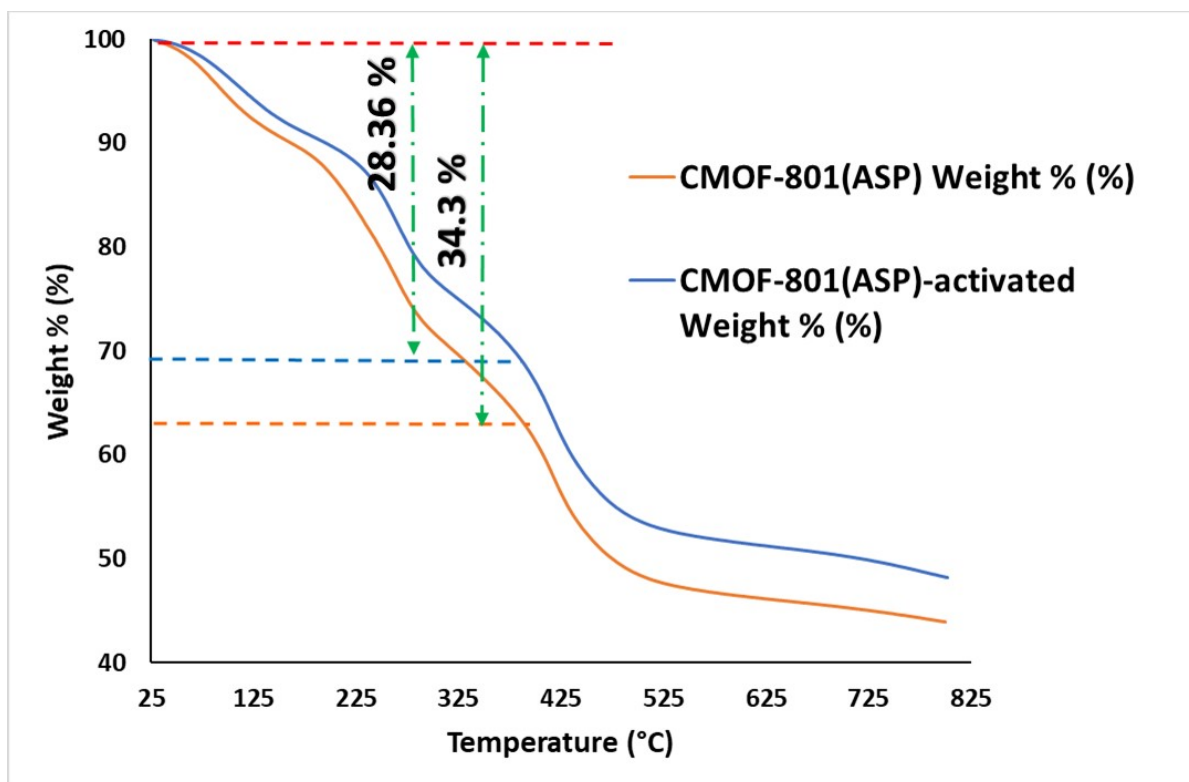

**Figure S4.** TGA curves of the CMOF-801(ASP) obtained before and after activation treatment for confirmation of generated defect sites, measured under 15 °C/min heating rate and N<sub>2</sub> carrier gas flow.

### Calculation of fumarate and aspartate ligands in CMOF-801(ASP)

The total weight loss in wt.% between 190°C (ligand containing state) and 519 °C (ligands are decomposed) for CMOF-801(ASP) was calculated to be 41.22%.

The detailed calculations are;

$$\text{CMOF-801(ASP): } (90.94-53.45)/90.94 = 41.22 \%$$

By taking into account, one of the six ligands is missed, and two aspartic acid present in the formula of the dehydrated MOF-801 to form a defect structure, theoretical loss of all ligands to be calculated as follows:

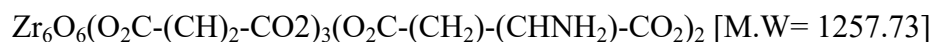

$$\text{MW of } (\text{ZrO}_2)_6 = 739.272$$

$$\text{Then estimated weight loss will be: } (1257.73-739.272)/1257.73 = 41.22 \%$$

Therefore, we can estimate that almost 1/6 ligand of its perfect crystal structure was missed in CMOF-801(ASP), and two aspartic acid were substituted in the two fumaric acid position.

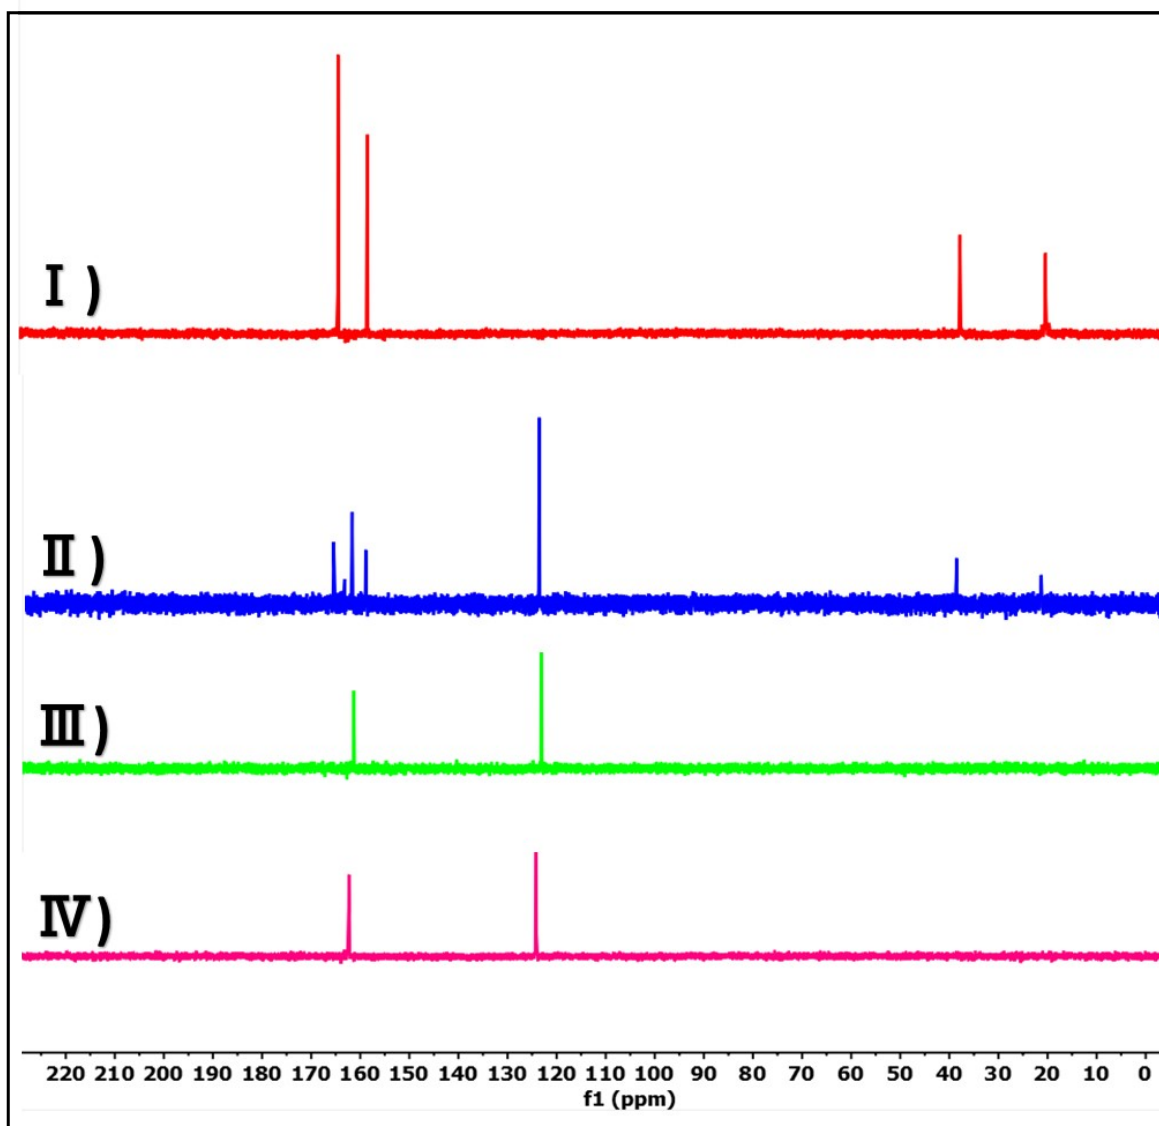

**Figure S5.**  $^{13}\text{C}$ NMR of (I) L-Aspartic acid, (II) CMOF-801(ASP), (III) Fumaric acid (IV) MOF-801(D)



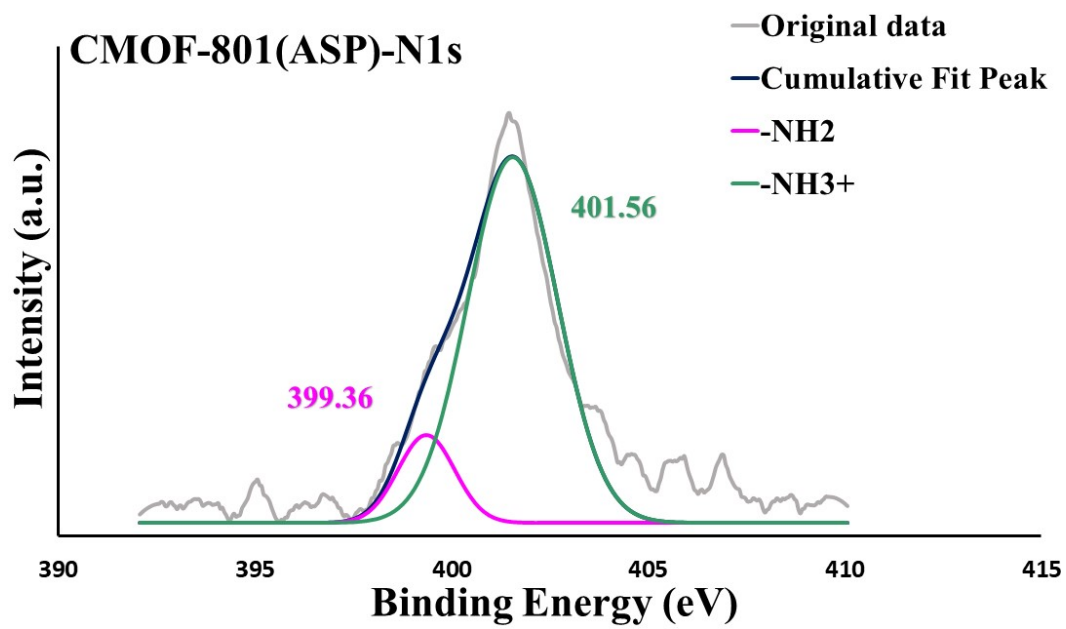

**Figure S6.** XPS spectra of N1s in CMOF-801(ASP), clarified high density of  $\text{NH}_3^+$  relative to  $\text{NH}_2$ .

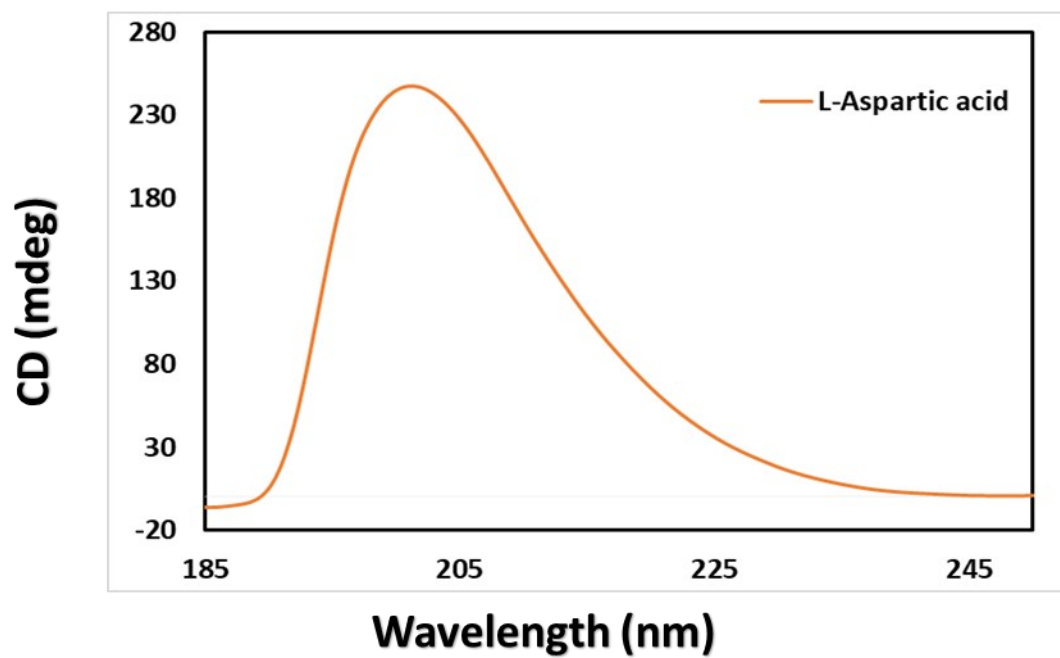

**Figure S7.** Circular dichroism (CD) spectra of (a) pure L-aspartic acid in aqueous solution.

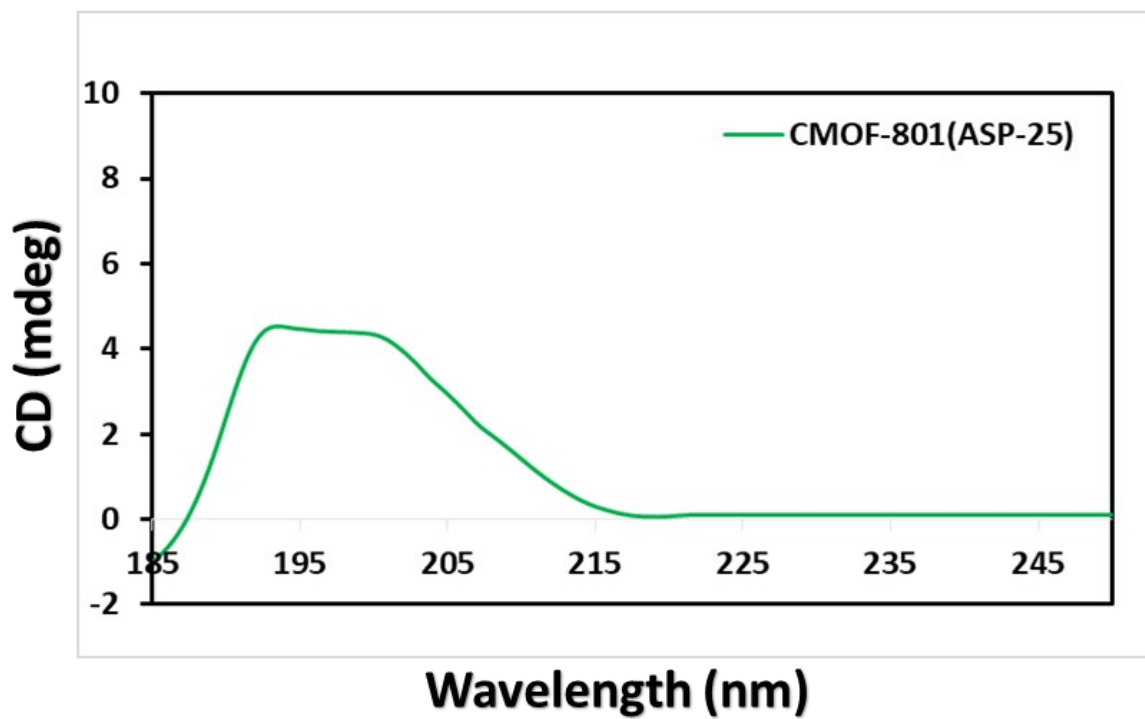

**Figure S8.** Circular dichroism (CD) spectra of (a) CMOF-801(ASP-25) dispersed in aqueous solution

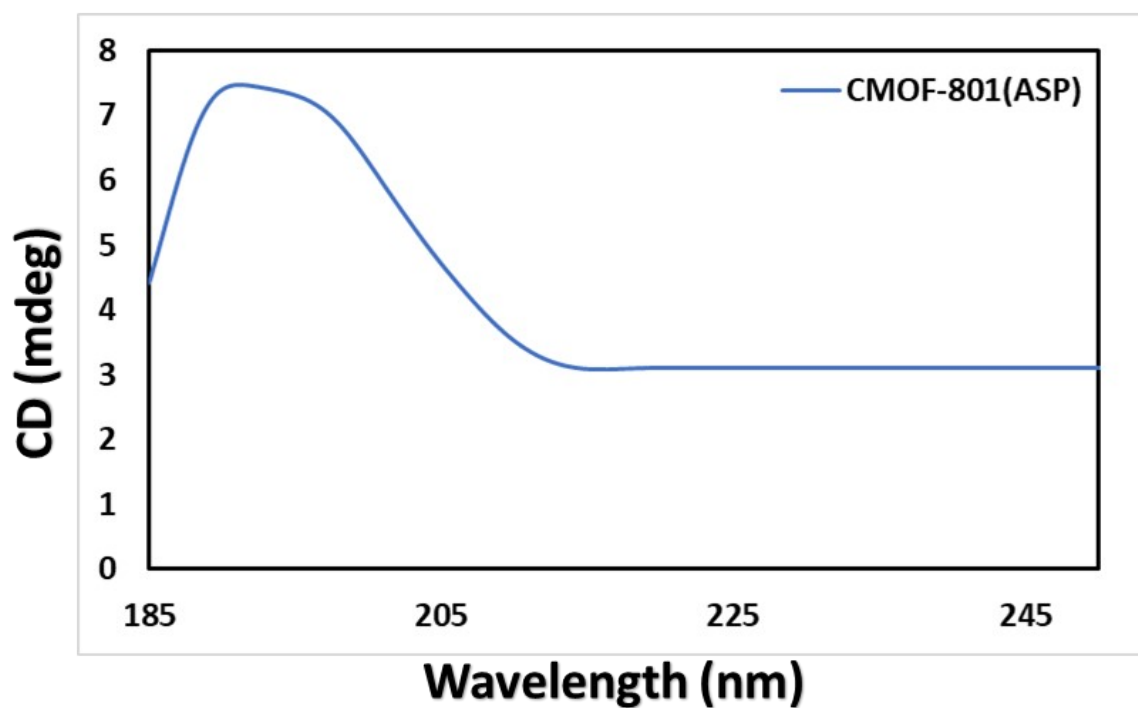

**Figure S9.** Circular dichroism (CD) spectra of (a) CMOF-801(ASP) dispersed in aqueous solution.

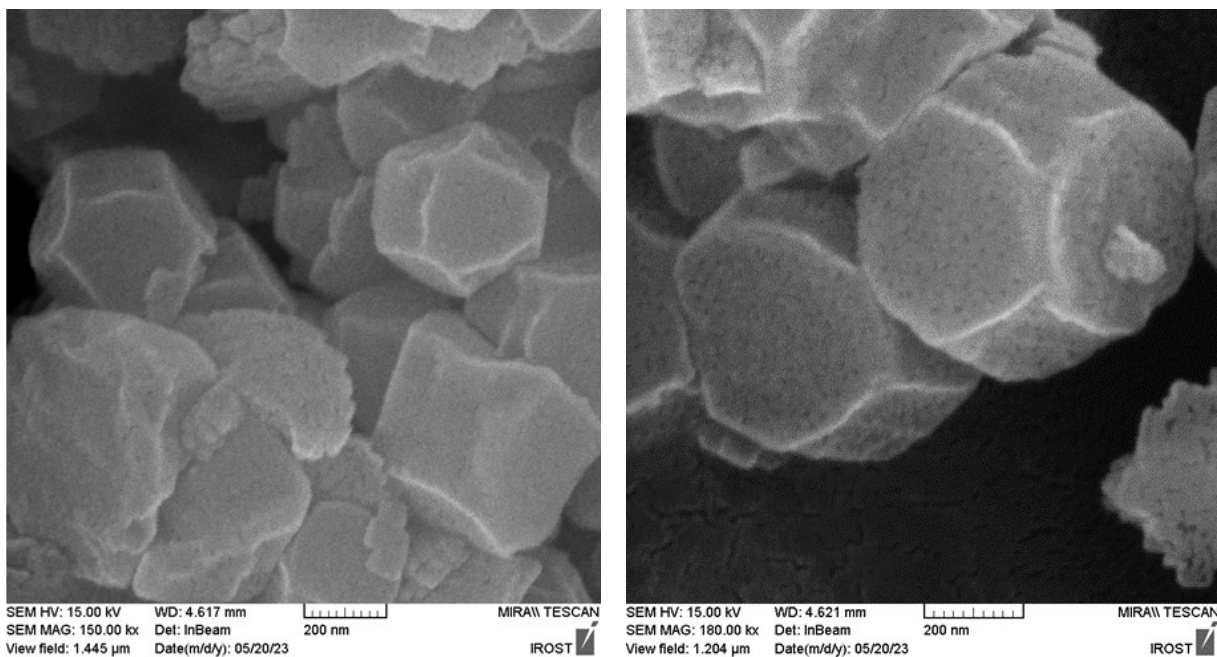

**Figure S10.** SEM images for MOF-801(D).

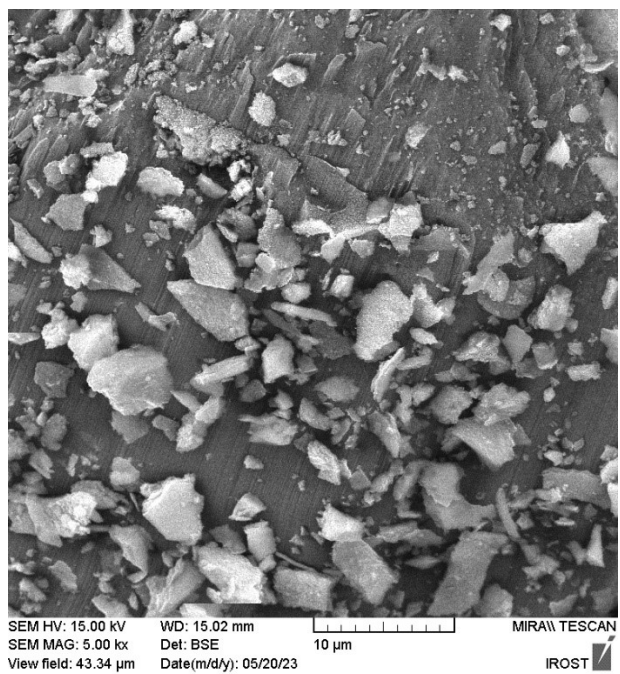

**Figure S11.** SEM images for CMOF-801(ASP).

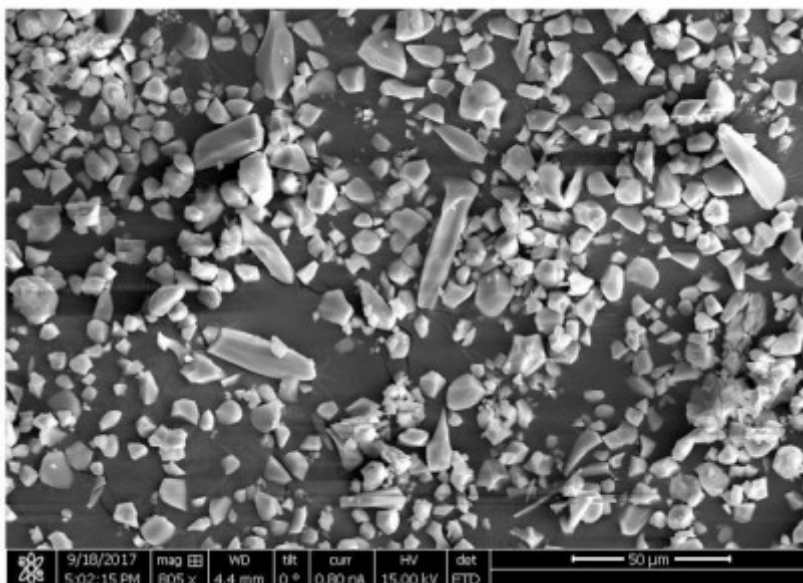

**Figure S12.** SEM images of MIP-202(Zr) sample obtained from reaction without stirring. with permission from <sup>1</sup>.

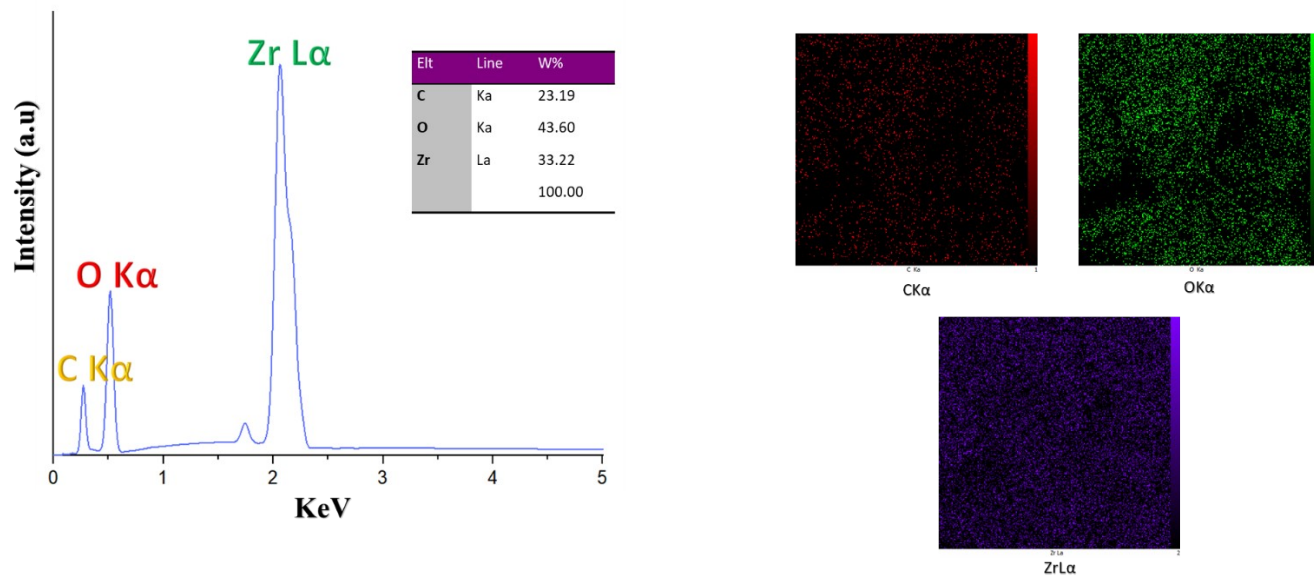

**Figure S13.** EDS spectra, and SEM-EDX elemental mapping of MOF-801(D).



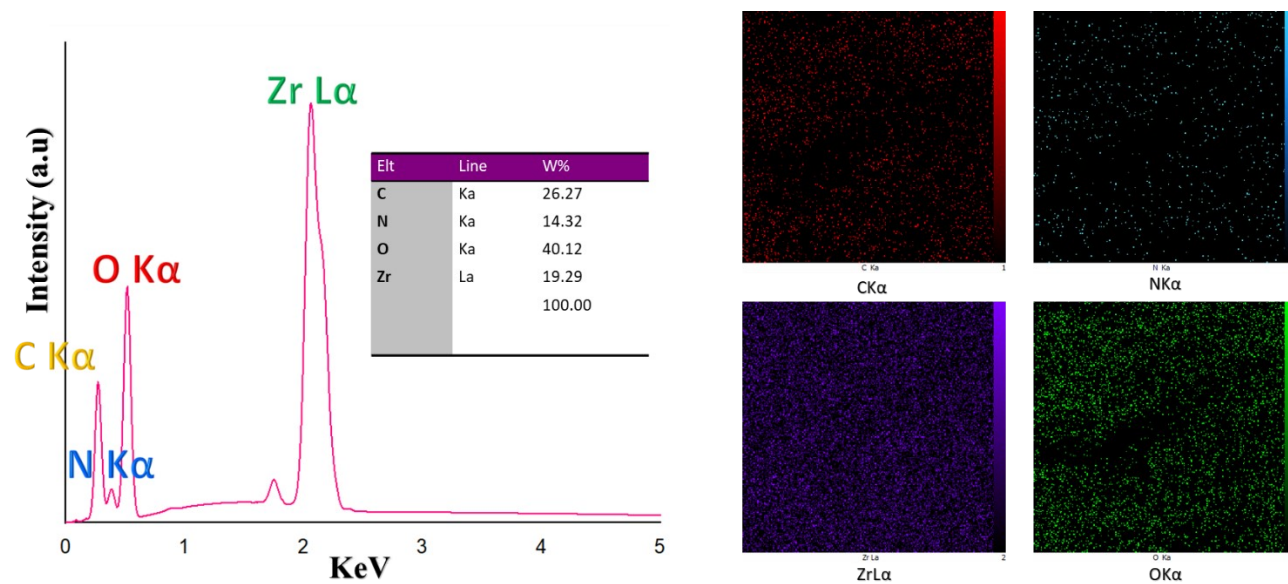

**Figure S14.** EDS spectra, and SEM-EDX elemental mapping of CMOF-801(ASP).

### Section S3. Ring-opening reaction Characterization

**Table S1. Optimization reaction condition for Ring-opening reaction**

| Entry | Catalyst                                     | Temperature (°C) | Time      | Conversion (%) | Ee (%) |
|-------|----------------------------------------------|------------------|-----------|----------------|--------|
| 1     | MOF-801(P)                                   | R.T              | 5 minutes | 2              | -      |
| 2     | MOF-801(P)                                   | 50°C             | 24 hour   | 20             | -      |
| 3     | MOF-801(D)                                   | R.T              | 5 minutes | 83             | -      |
| 4     | CMOF-801(ASP-25)                             | R.T              | 5 minutes | 90             | R      |
| 4     | CMOF-801(ASP)                                | R.T              | 5 minutes | 100            | R      |
| 5     | Fumaric acid                                 | R.T              | 5 minutes | 5              | -      |
| 6     | L-Aspartic acid                              | R.T              | 5 minutes | 8              | R      |
| 7     | ZrCl <sub>4</sub>                            | R.T              | 5 minutes | 5>             | -      |
| 8     | Physical mixture of L-ASP& ZrCl <sub>4</sub> | R.T              | 5 minutes | 10>            | -      |

**Table S2. Reaction scope for Ring opening reaction of epoxides with various nucleophiles catalysed in the presence of CMOF-801(ASP) as a heterogeneous catalyst<sup>a</sup>**

| Entry | Alcohol    | Epoxide                                                                             | Product                                                                              | Conversion (%) <sup>b</sup> |
|-------|------------|-------------------------------------------------------------------------------------|--------------------------------------------------------------------------------------|-----------------------------|
| 1     | Methanol   | 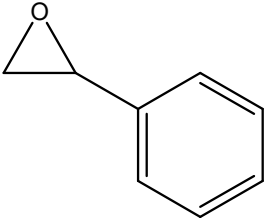   |    | 100                         |
| 2     | Ethanol    |    |    | 48 <sup>c</sup>             |
| 3     | 2-propanol |   |   | 13 <sup>c</sup>             |
| 4     | Methanol   |  |  | 28 <sup>c</sup>             |

<sup>a</sup> Reaction conditions: epoxide (30 mg), alcohols (2 mL), CMOF-801(ASP) catalyst (5 mg), room temperature, 5 minutes.

<sup>b</sup> Isolated product determined by GC.

<sup>c</sup> In 15 minutes.

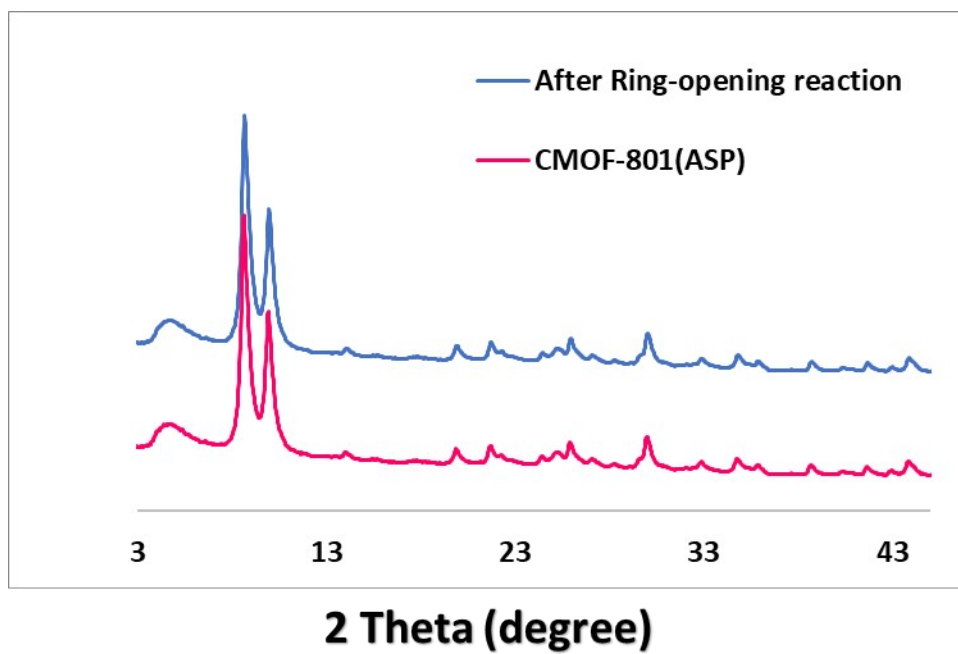

**Figure S15.** PXRD pattern comparison before and after using of CMOF-801(ASP) chiral catalyst for ring opening reaction.

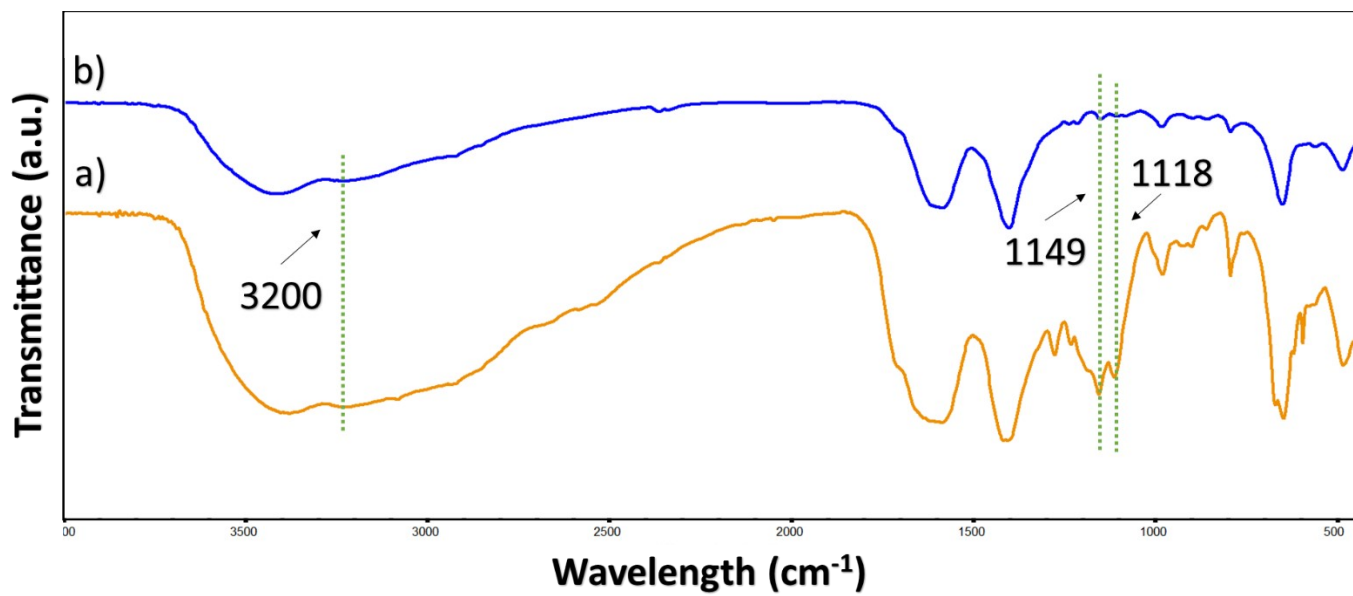

**Figure S16.** FTIR spectrum comparison (a) before and (b) after using of CMOF-801(ASP) chiral catalyst for ring opening reaction.

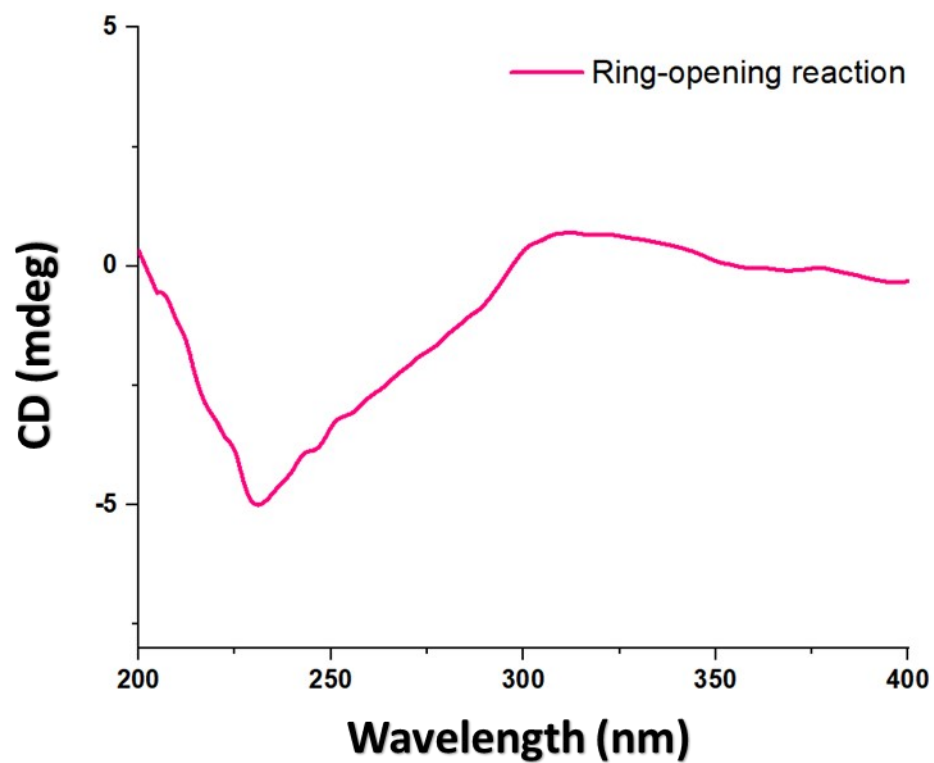

**Figure S17.** Circular dichroism for characterization of major enantiomer for the ring-opening reaction.

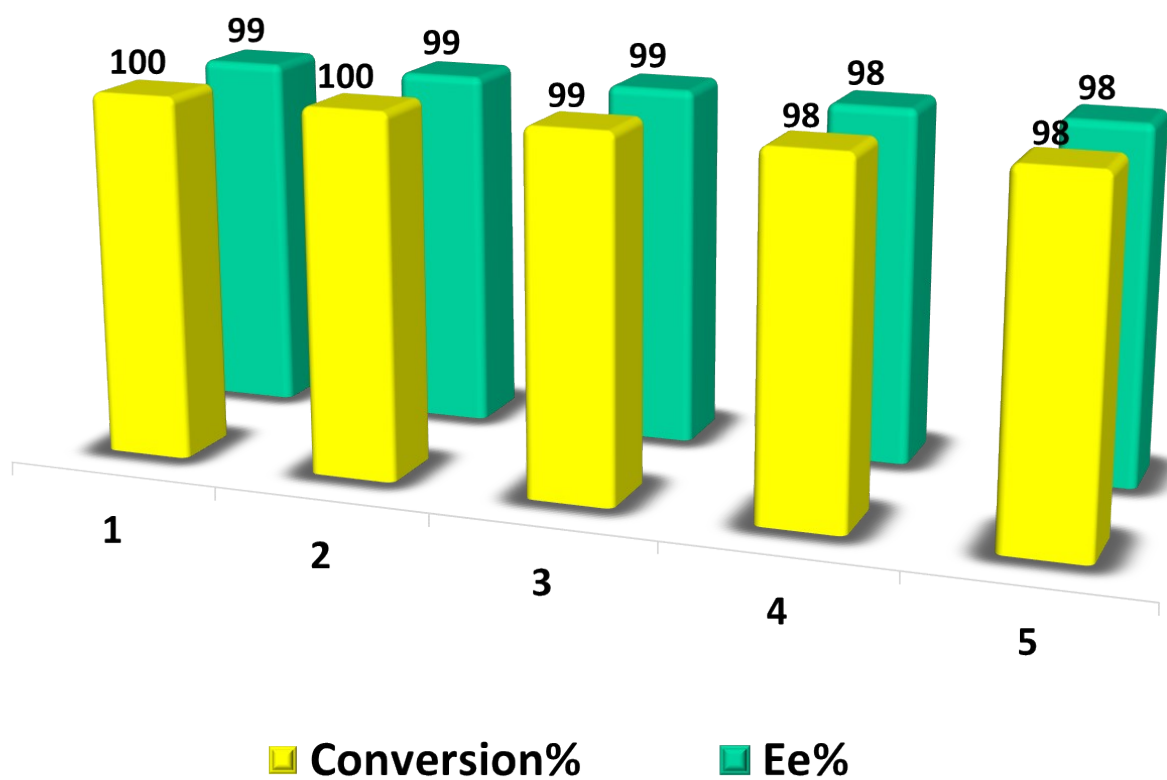

**Figure S18.** Reusability tests of CMOF-801(ASP) for Ring-opening reaction.

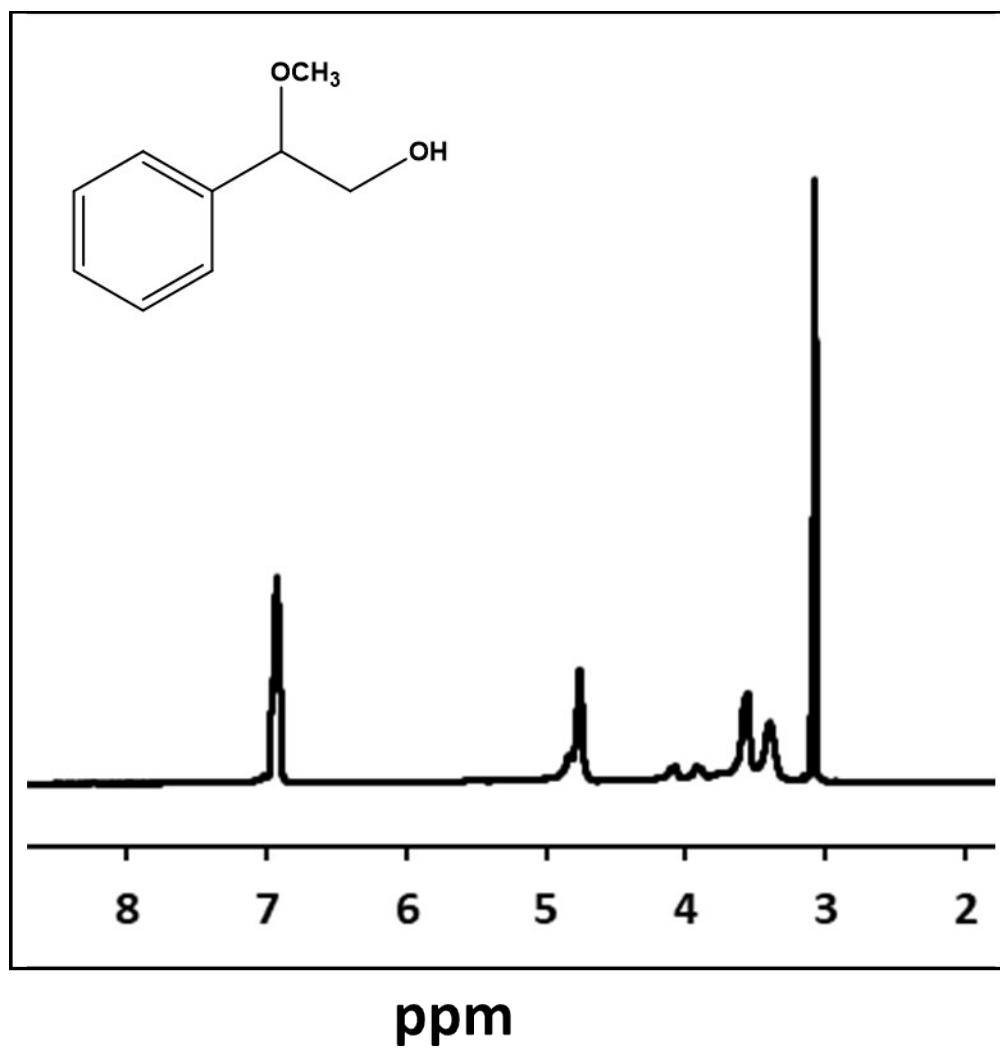

**Figure S19.** <sup>1</sup>H NMR of 2-methoxy-2-phenylethan-1-ol in D<sub>2</sub>SO<sub>4</sub>.



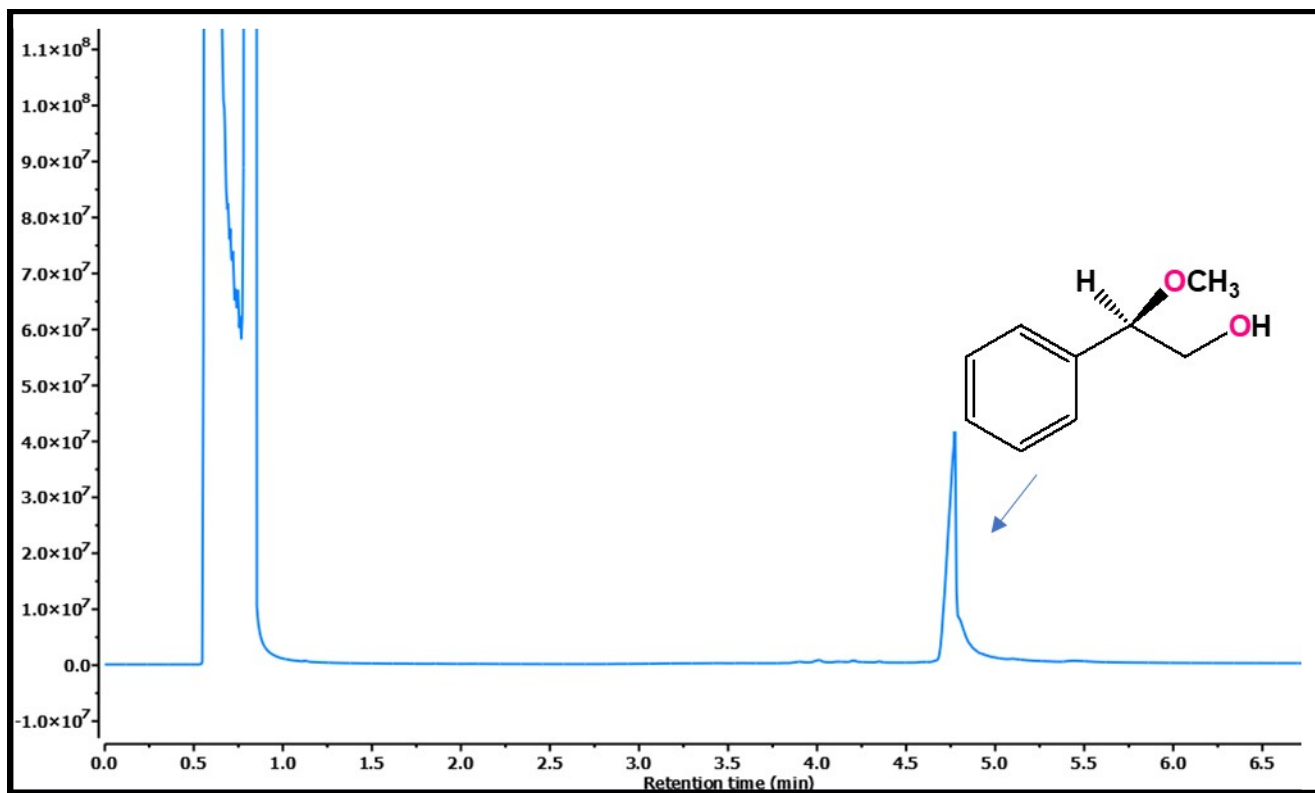

**Figure S20.** GC chromatogram for the ring-opening of styrene epoxide catalyzed by CMOF-801(ASP)

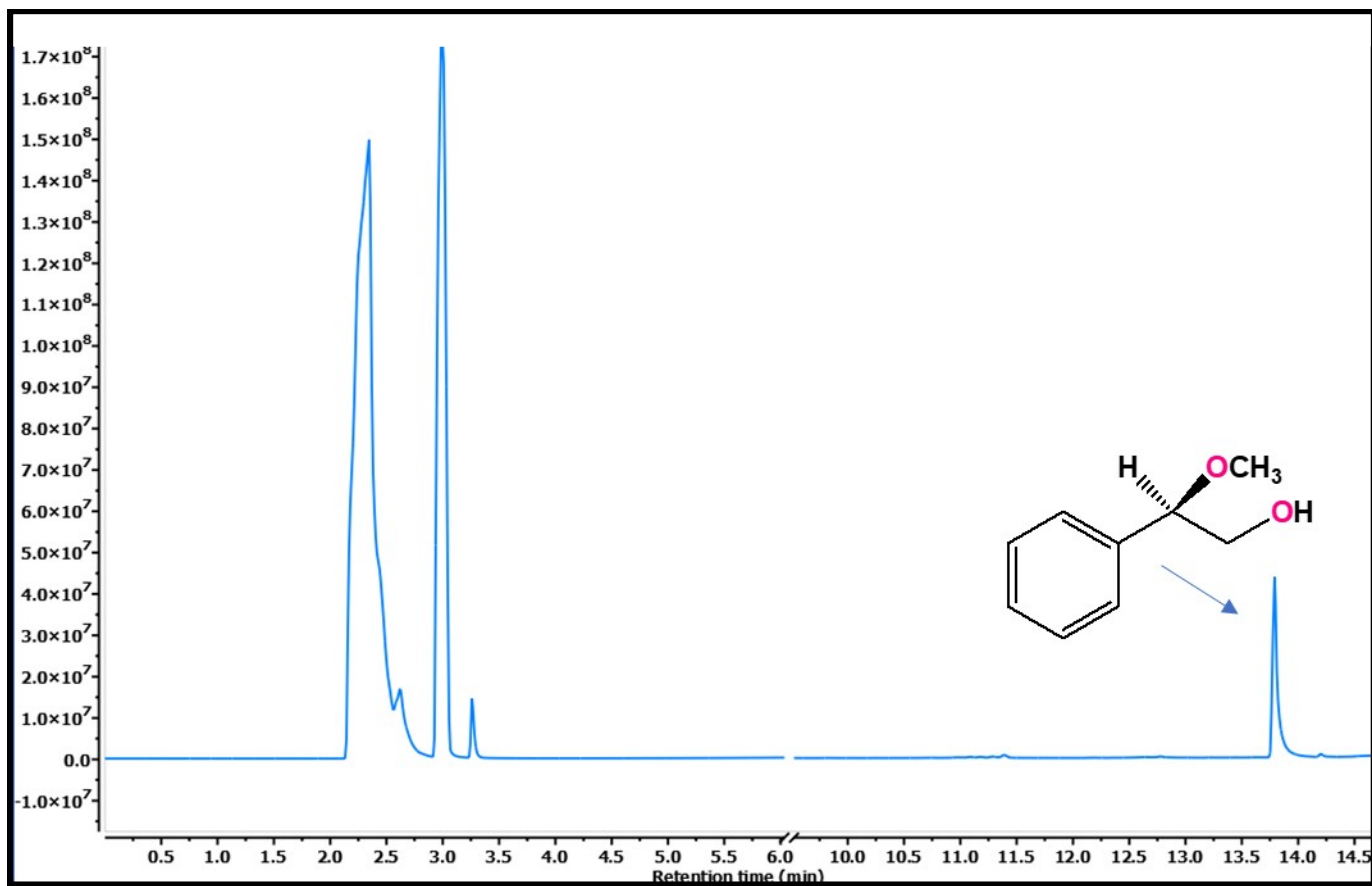

**Figure S21.** Chiral GC chromatogram for the ring-opening of styrene epoxide catalyzed by CMOF-801(ASP)

**Table S3.** Comparison of CMOF-801-(ASP) with other catalysts in ring-opening reaction for epoxy styrene.

| Entry | Catalyst            | Tem<br>p<br>(°C) | Time      | Yield (%) | Ref.             |
|-------|---------------------|------------------|-----------|-----------|------------------|
| 1     | <b>UiO-66</b>       | 55               | 12h       | 100       | 2                |
| 2     | <b>(R)-MOF-1</b>    | 60 °C            | 24        | 95        | 3                |
| 3     | <b>(R)-3</b>        | 40 °C            | 24        | 48        | 4                |
| 4     | <b>(R)-3</b>        | 60 °C            | 24        | 66        | 4                |
| 5     | <b>TMU-50S</b>      | 60 °C            | 32        | 98        | 5                |
| 6     | <b>MOF-801(P)</b>   | R.T              | 5 minuets | 10        | <b>This work</b> |
| 7     | <b>MOF-801(D)</b>   | R.T              | 5 minuets | 83        | <b>This work</b> |
| 8     | <b>MOF-801(ASP)</b> | R.T              | 5 minuets | 100       | <b>This work</b> |

## Section S4. Henry reaction Characterization

**Table S4. Optimization reaction condition for Henry reaction.**

| Entry | Catalyst                                     | Temperature (°C) | Time      | Conversion (%) | Ee (%) |
|-------|----------------------------------------------|------------------|-----------|----------------|--------|
| 1     | MOF-801(P)                                   | R.T              | 24 hour   | 15             | -      |
| 3     | MOF-801(D)                                   | R.T              | 5 minutes | 89             | -      |
| 4     | CMOF-801(ASP-25)                             | R.T              | 5 minutes | 92             | R      |
| 4     | CMOF-801(ASP)                                | R.T              | 5 minutes | 100            | R      |
| 5     | Fumaric acid                                 | R.T              | 5 minutes | N.R            | -      |
| 6     | L-Aspartic acid                              | R.T              | 5 minutes | 5>             | R      |
| 7     | ZrCl <sub>4</sub>                            | R.T              | 5 minutes | 14             | -      |
| 8     | Physical mixture of L-ASP& ZrCl <sub>4</sub> | R.T              | 5 minutes | 17             | -      |

**Table S5. Reaction scope for Henry Reaction with various substituted benzaldehyde and nitromethane catalysed in the presence of CMOF-801(ASP) as a heterogeneous catalyst <sup>a</sup>**

| Entry | Aldehyde                                                                            | Solvent | Product                                                                              | Conversion (%) <sup>b</sup> |
|-------|-------------------------------------------------------------------------------------|---------|--------------------------------------------------------------------------------------|-----------------------------|
| 1     | 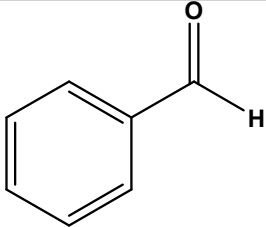   | MeOH    |    | 100                         |
| 2     |    | MeOH    |    | 100                         |
| 3     |   | MeOH    |   | 81                          |
| 4     |  | MeOH    |  | 100                         |

<sup>a</sup> Reaction conditions: aldehyde (2 mmol) and nitromethane (5 mmol) in 2 mL of MeOH at room temperature for 15 minutes.

<sup>b</sup> Isolated product determined by GC.

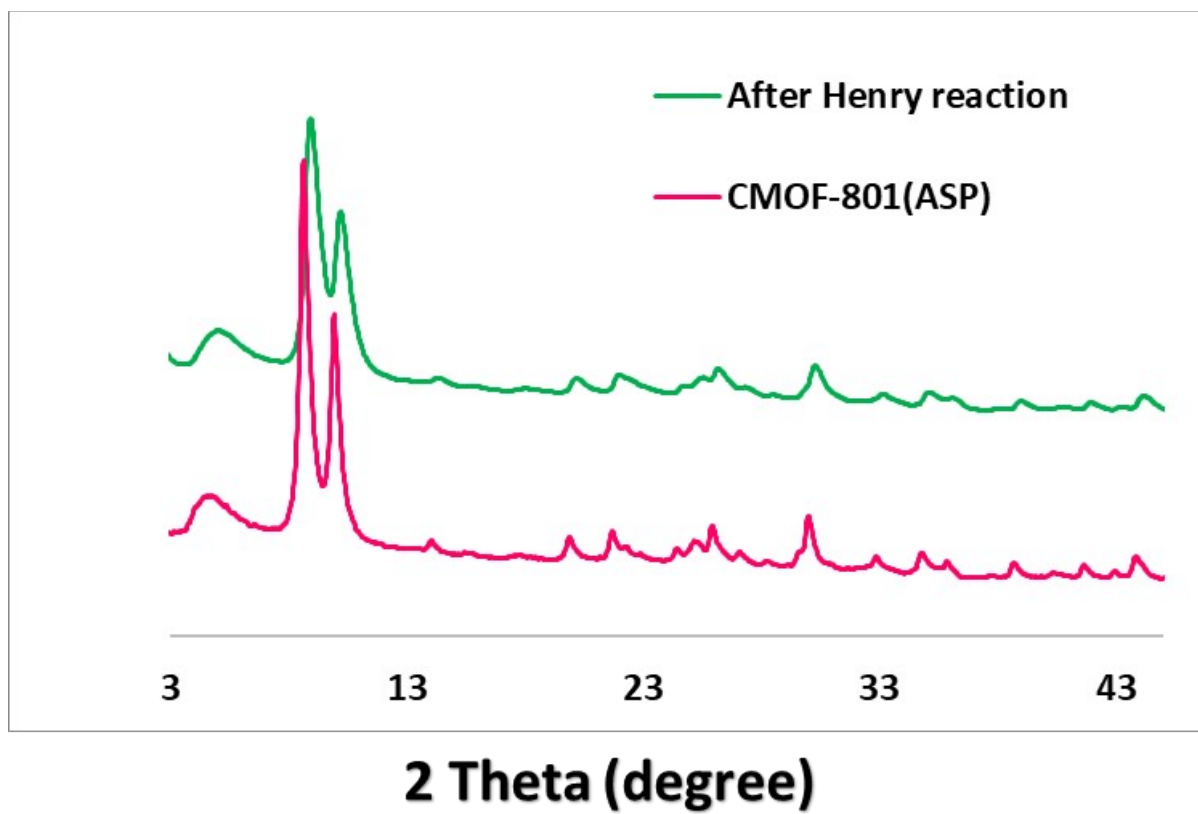

**Figure S22.** PXRD pattern comparison before and after using of CMOF-801(ASP) chiral catalyst for Henry reaction.

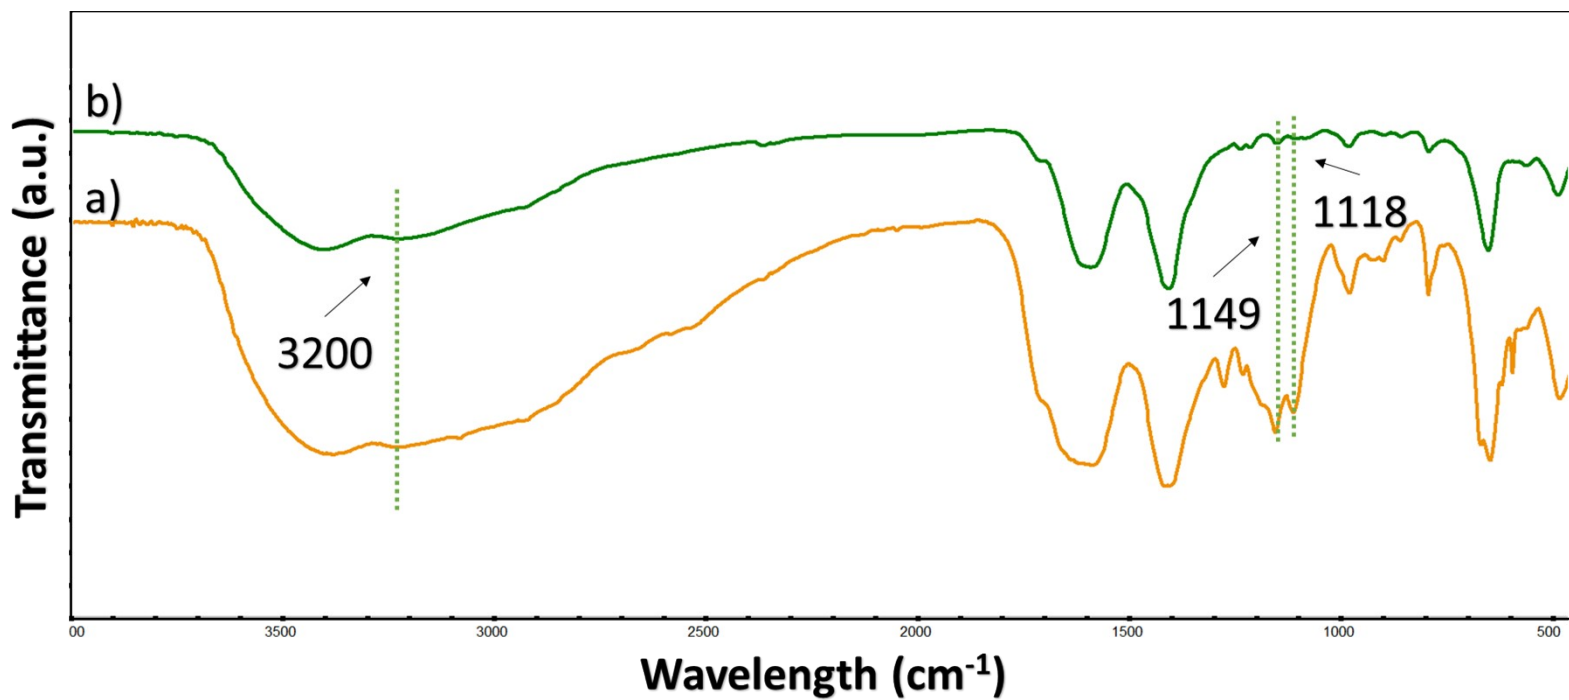

**Figure S23.** FTIR spectrum comparison (a) before and (b) after using of CMOF-801(ASP) chiral catalyst for nitroaldole reaction.

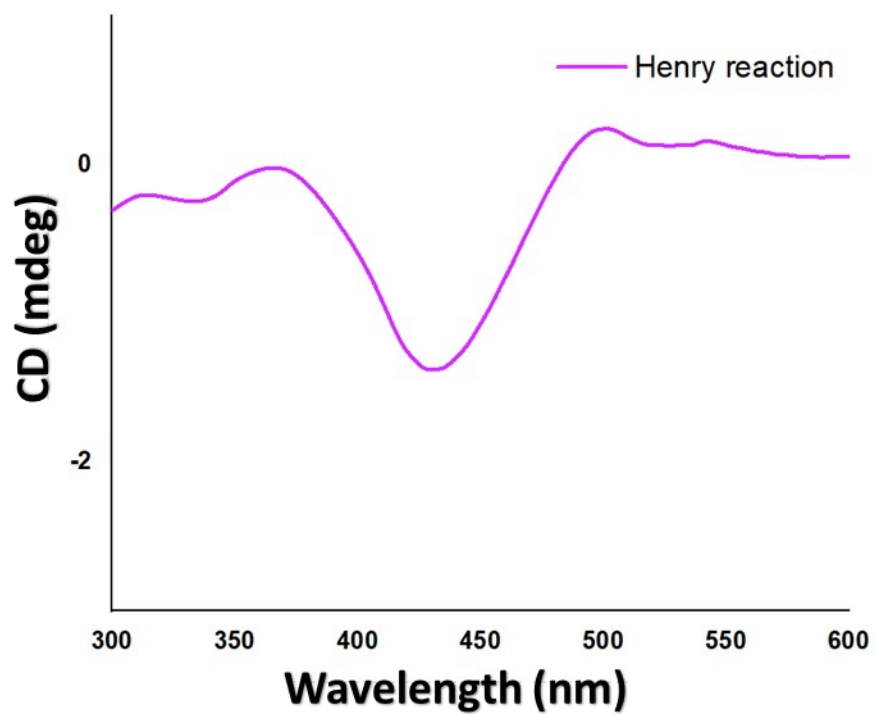

**Figure S24.** Circular dichroism for characterization of major enantiomer for the Henry reaction.



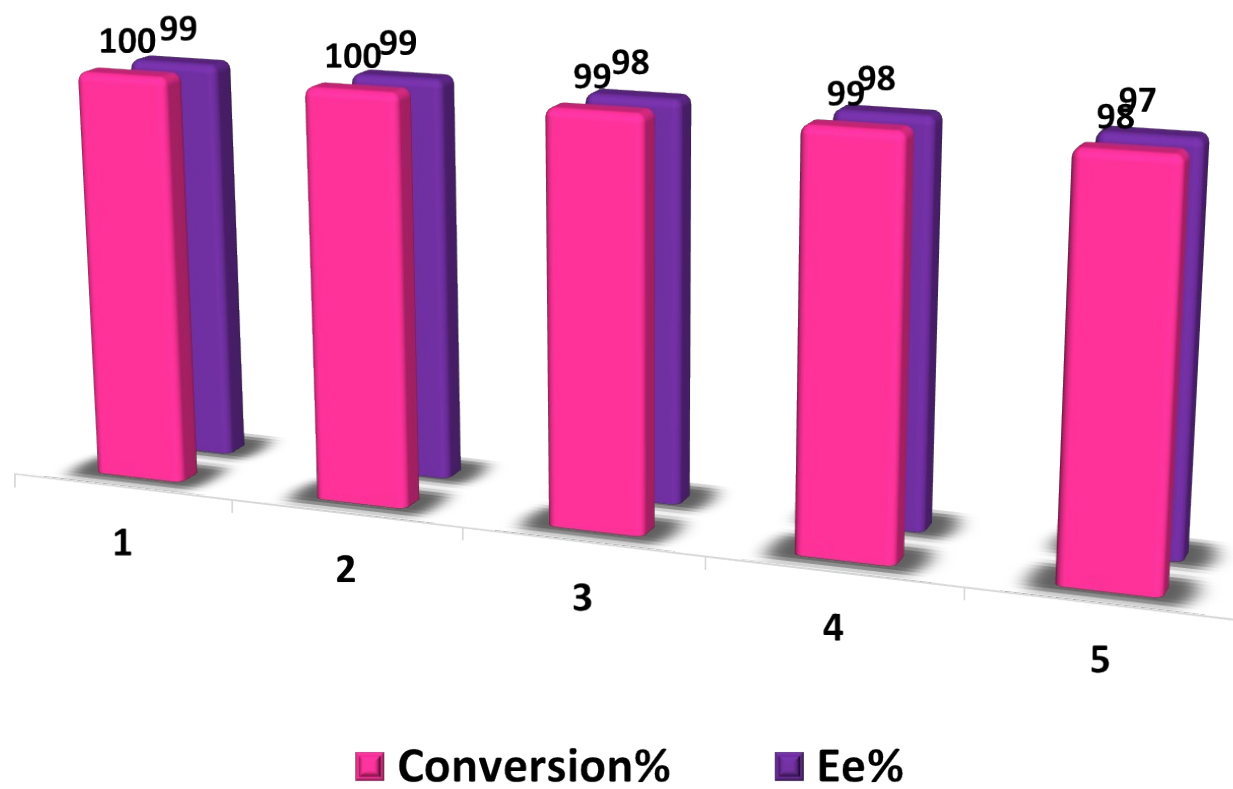

**Figure S25.** Reusability tests of CMOF-801(ASP) for Henry reaction.

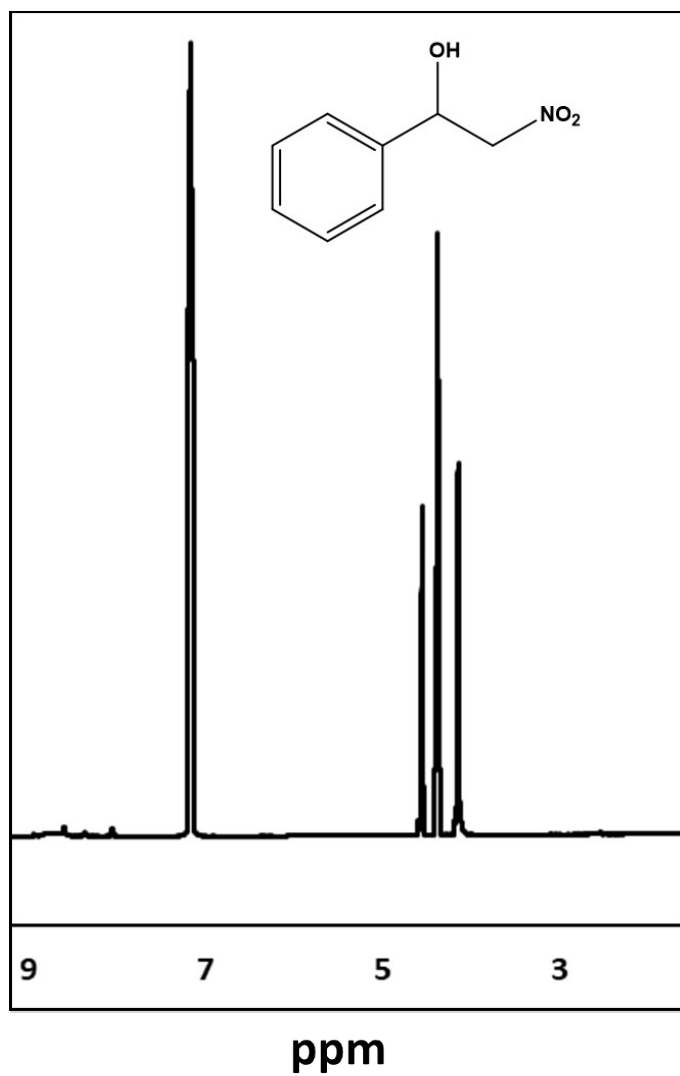

**Figure S26.**  $^1\text{H}$  NMR of 2-Nitro-1-phenylethan-1-ol in  $\text{D}_2\text{SO}_4$ .

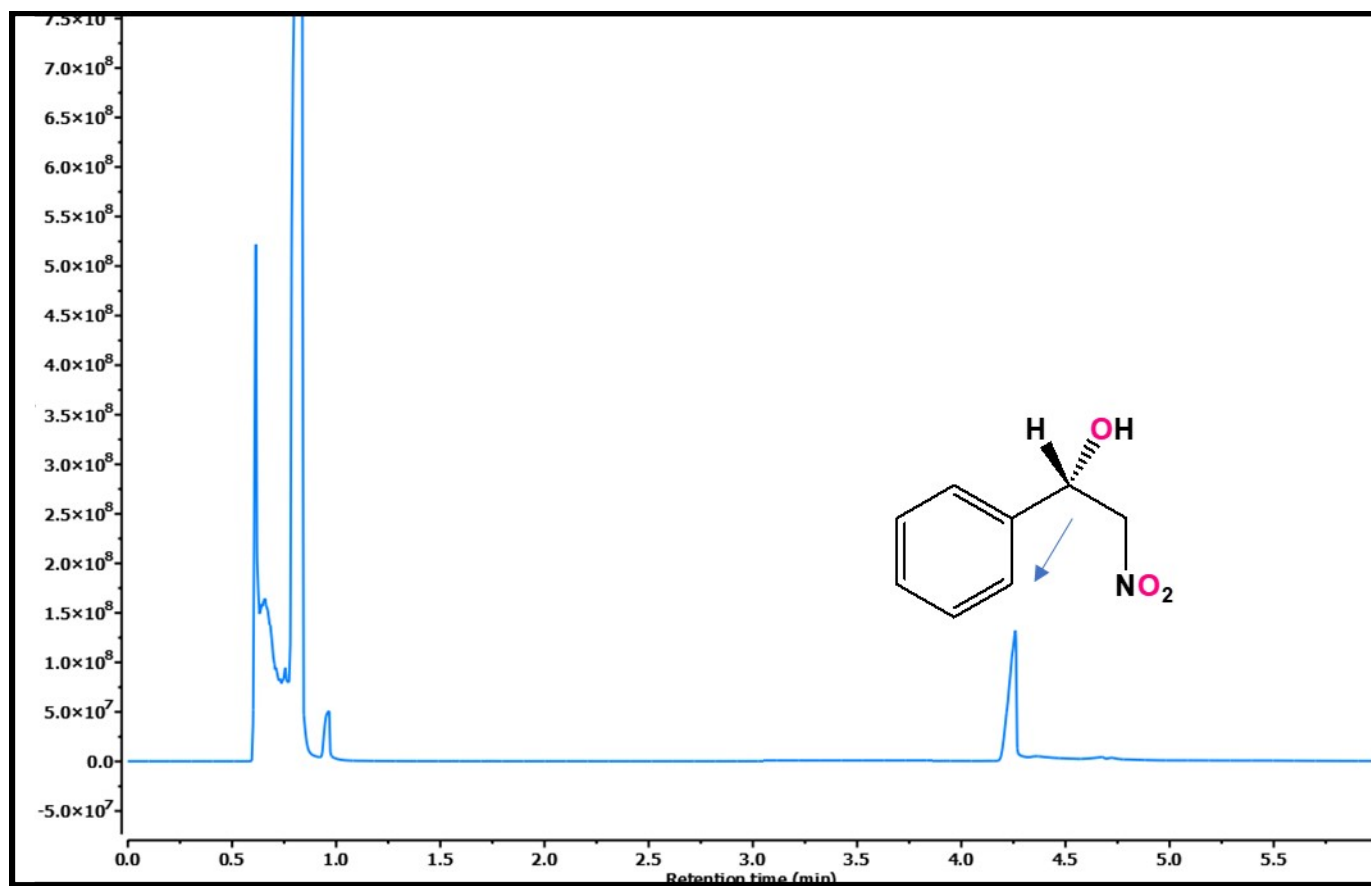

**Figure S27.** GC chromatogram for the Henry reaction catalyzed by CMOF-801(ASP).

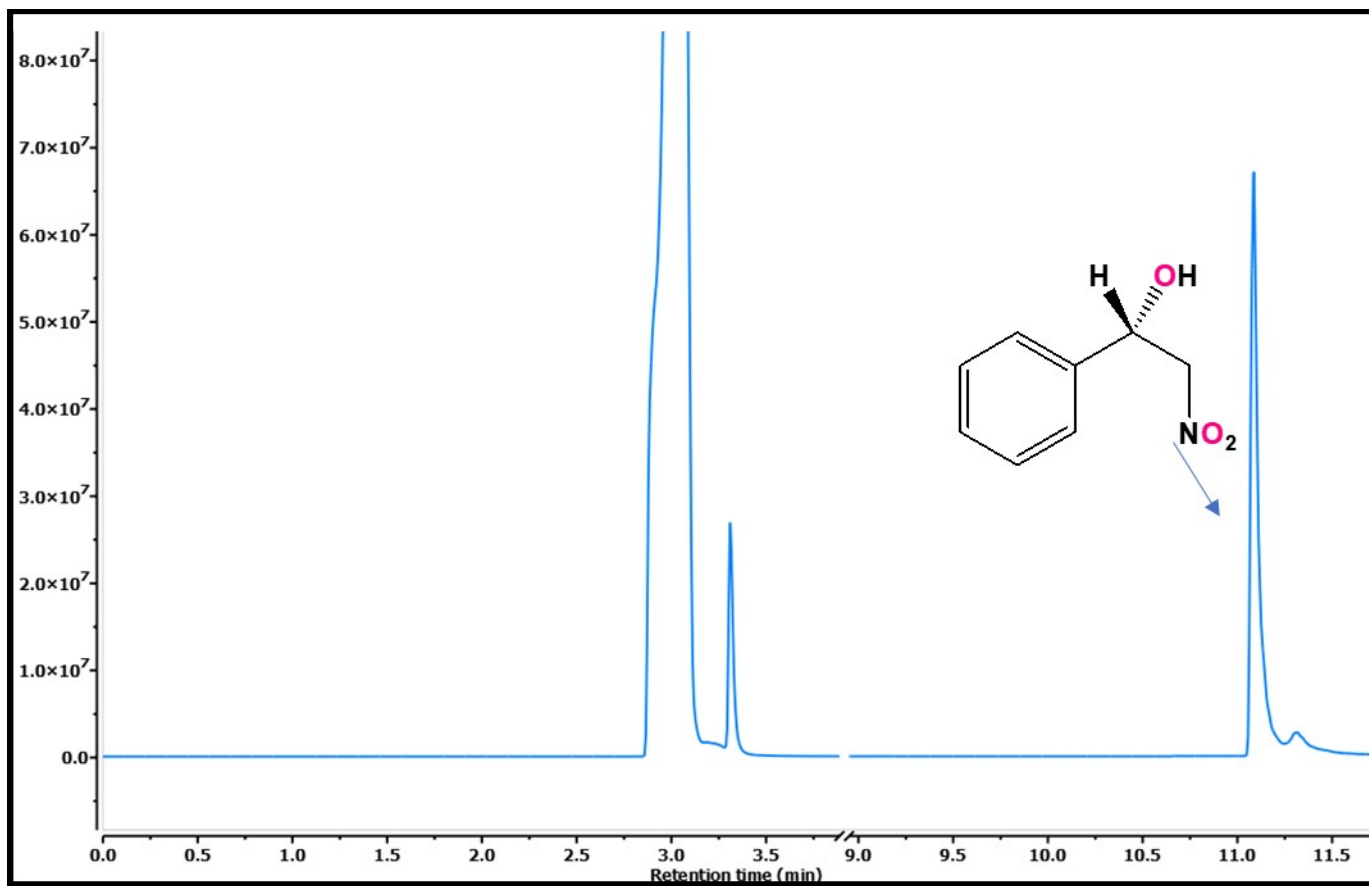

**Figure S28.** Chiral GC chromatogram for the ring-opening of styrene epoxide catalyzed by CMOF-801(ASP)

**Table S6.** Comparison of CMOF-801-(ASP) with other catalysts Henry reaction.

| Entry | Catalyst                            | Tem<br>p<br>(°C) | Time       | Yield (%) | Ref.             |
|-------|-------------------------------------|------------------|------------|-----------|------------------|
| 1     | Zn-MOF                              | 70               | 48h        | 84        | 6                |
| 2     | Cd-MOF                              | R.T              | 72h        | 89        | 7                |
| 3     | Sm-MOF                              | 70               | 36h        | 43        | 8                |
| 4     | [Cd <sub>2</sub> (Cu(salen)-<br>MOF | R.T              | 48h        | 31        | 9                |
| 5     | Pd@DP-<br>ZIF67/CalA                | R.T              | 20h        | 96        | 10               |
| 6     | MOF-801(P)                          | R.T              | 15 minuets | 8         | <b>This work</b> |
| 7     | MOF-801(D)                          | R.T              | 15 minuets | 80        | <b>This work</b> |
| 8     | MOF-801(ASP)                        | R.T              | 15 minuets | 100       | <b>This work</b> |

## Section S5. Oxazolidinone formation reaction Characterization

Table S7. Optimization reaction condition for Oxazolidinone formation

| Entry | Catalyst                                     | Temperature (°C) | Time (hour) | Pressure (atm) | Conversion (%) | Ee (%) |
|-------|----------------------------------------------|------------------|-------------|----------------|----------------|--------|
| 1     | MOF-801(P)                                   | 90               | 12          | 1              | 15             | -      |
| 3     | MOF-801(D)                                   | 90               | 12          | 1              | 20             | -      |
| 4     | CMOF-801(ASP-25)                             | 90               | 12          | 1              | 76             | S      |
| 4     | CMOF-801(ASP)                                | 90               | 12          | 1              | 90             | S      |
| 5     | Fumaric acid                                 | 90               | 12          | 1              | N.R            | -      |
| 6     | L-Aspartic acid                              | 90               | 12          | 1              | N.R            | S      |
| 7     | ZrCl <sub>4</sub>                            | 90               | 12          | 1              | N.R            | -      |
| 8     | Physical mixture of L-ASP& ZrCl <sub>4</sub> | 90               | 12          | 1              | 7              | -      |

**Table S8. Reaction scope for the three-component cycloaddition of CO<sub>2</sub> with aromatic amines and substituted epoxides in the presence of CMOF-801(ASP) as a heterogeneous catalyst<sup>a</sup>**

| Entry | Aromatic amine                                                                      | Epoxide                                                                             | Product                                                                              | Conversion (%) <sup>b</sup> |
|-------|-------------------------------------------------------------------------------------|-------------------------------------------------------------------------------------|--------------------------------------------------------------------------------------|-----------------------------|
| 1     | 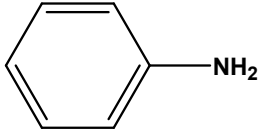   |    |    | 90                          |
| 2     |    |    |   | 72                          |
| 3     |  |  |  | 92                          |
| 4     |  |  |  | 83                          |

<sup>a</sup> Reaction conditions: epoxide (6.0 mmol), aromatic amine (2.0 mmol), CO<sub>2</sub> (1 bar), CMOF-801(ASP) catalyst (50 mg), solvent-free, 12 h, 90 °C.

<sup>b</sup> Isolated yield calculated with respect to aromatic amine as determined by GC

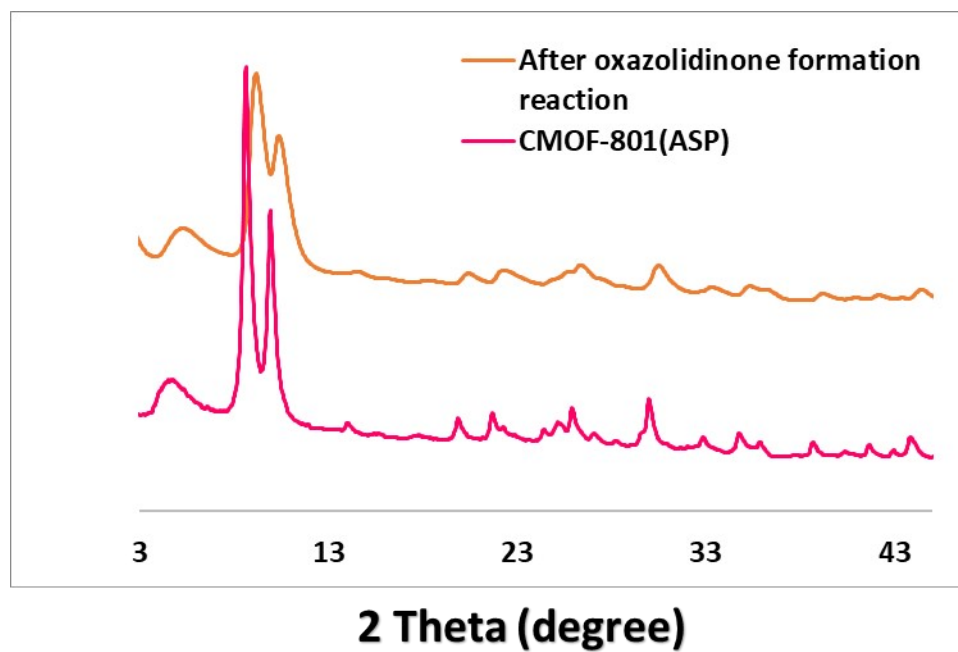

**Figure S29.** PXRD pattern comparison before and after using of CMOF-801(ASP) chiral catalyst for oxazolidinone formation reaction.



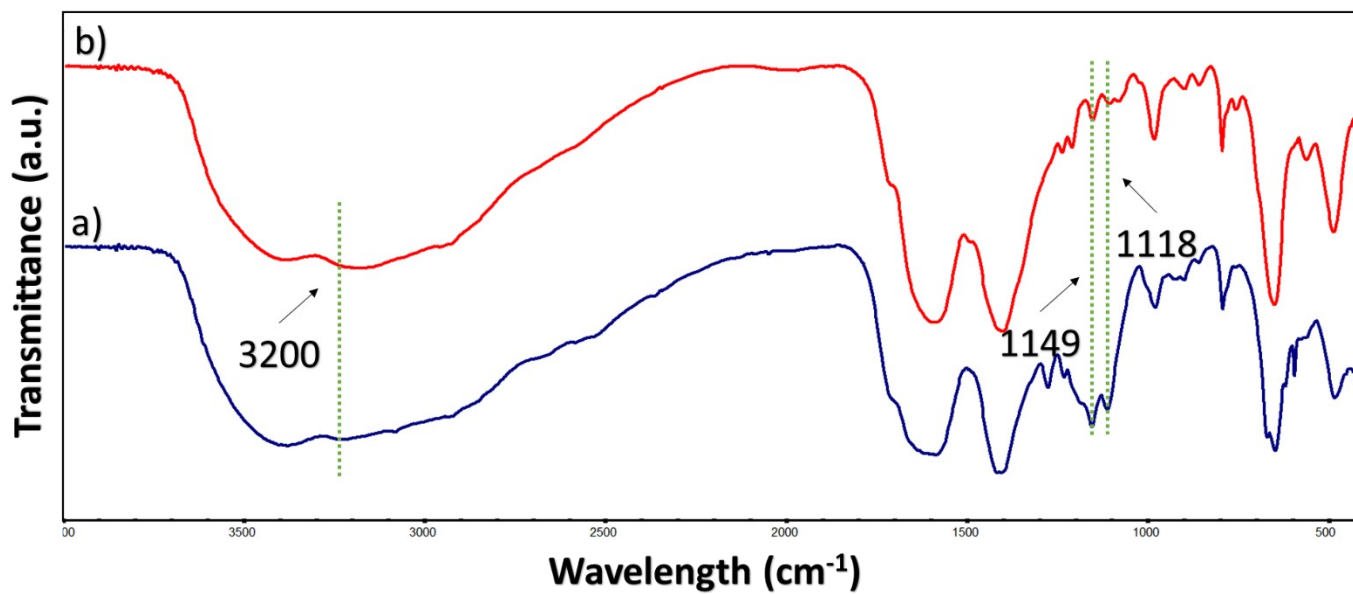

**Figure S30.** FTIR spectrum comparison (a) before and (b) after using of CMOF-801(ASP) chiral catalyst for oxazolidinone formation reaction.

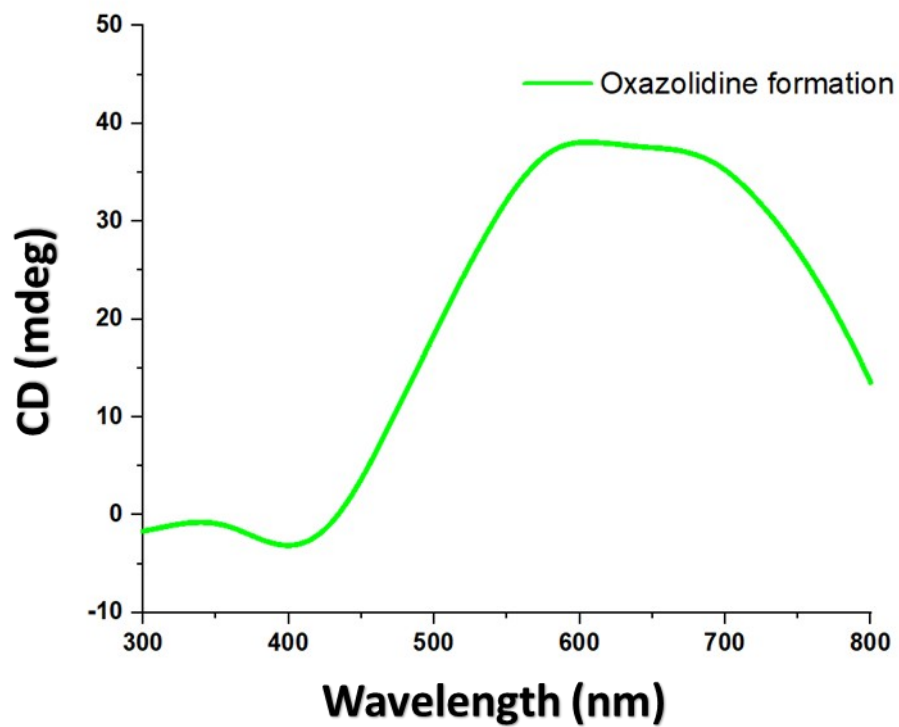

**Figure S31.** Circular dichroism for characterization of major enantiomer for the oxazolidinones formation reaction.

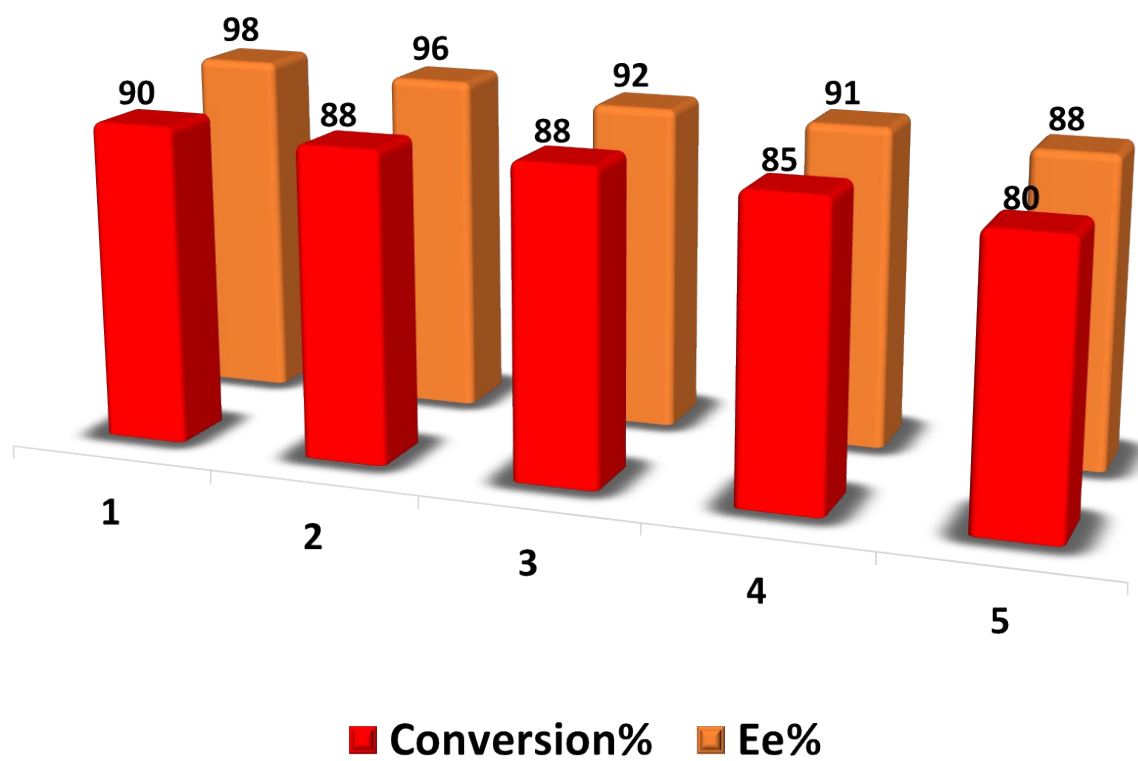

**Figure S32.** Reusability tests of CMOF-801(ASP) for oxazolidinone formation reaction.

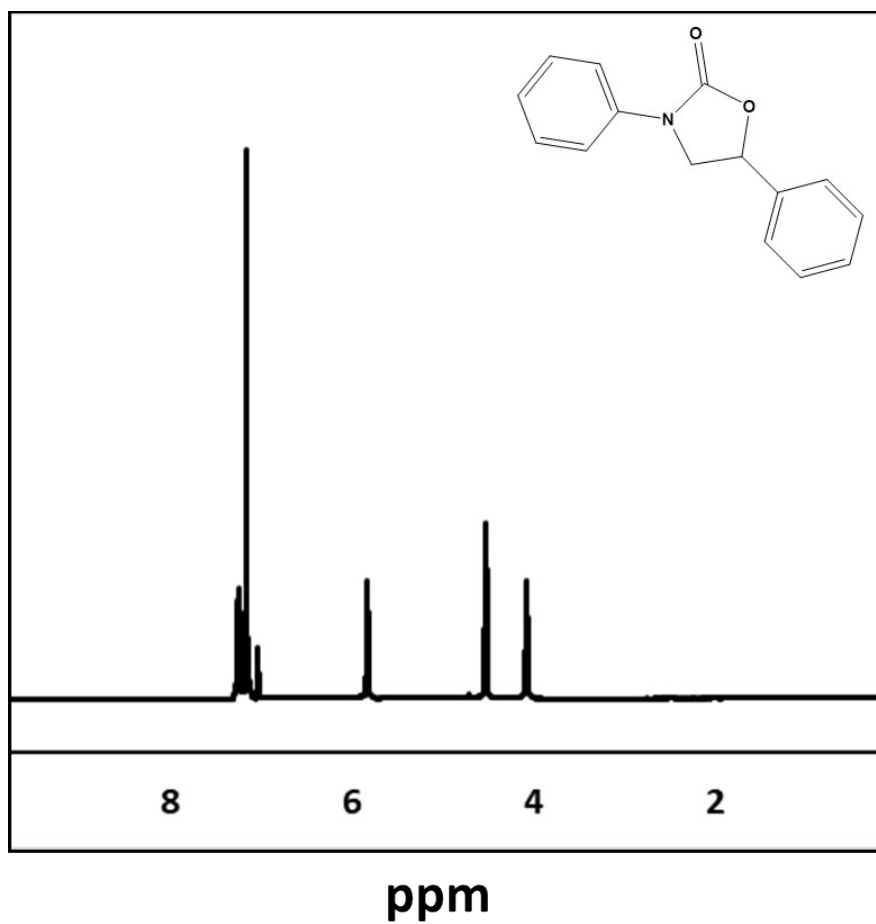

**Figure S33.**  $^1\text{H}$  NMR of 3,5-diphenyloxazolidin-2-one.

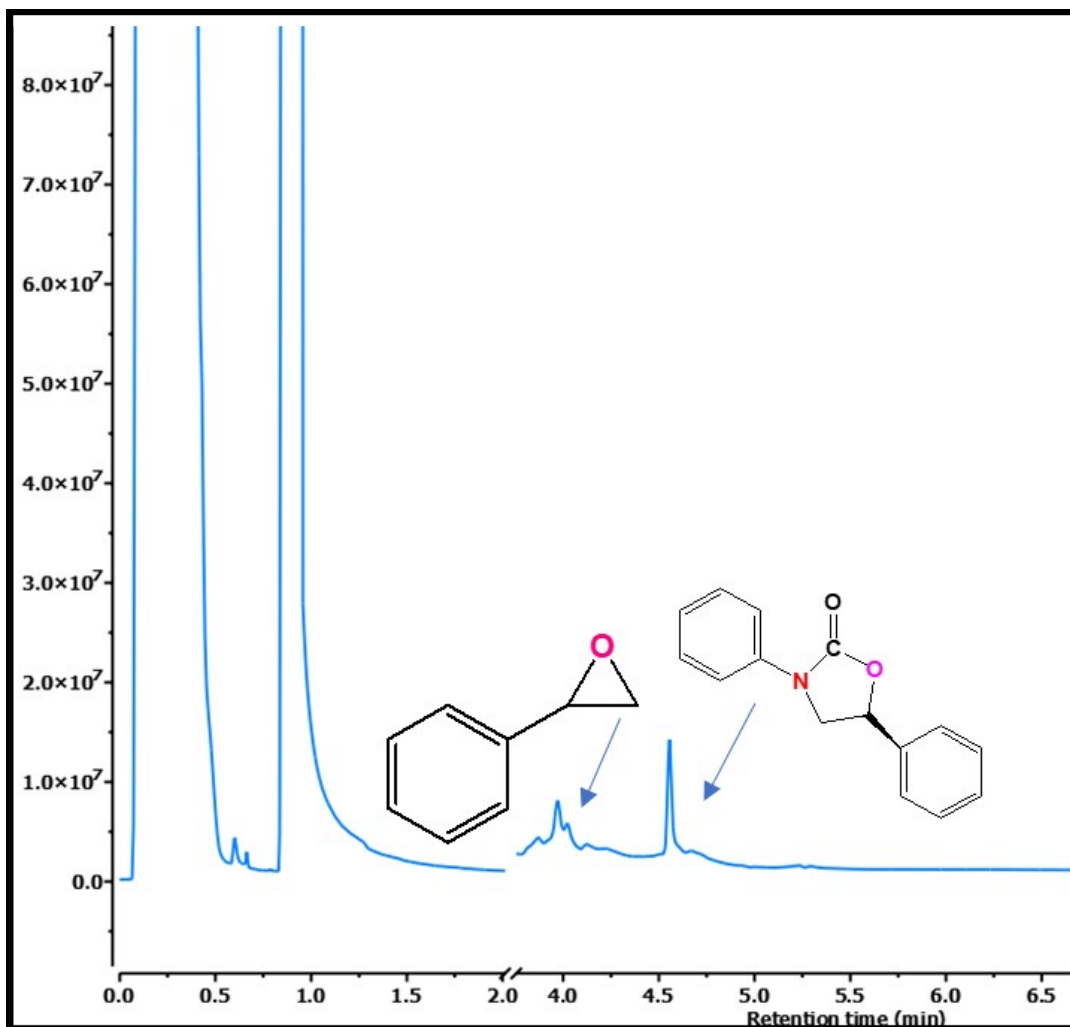

**Figure S34.** GC chromatogram for the oxazolidinone conversion through cycloaddition of  $\text{CO}_2$  into styrene epoxide catalyzed by CMOF-801(ASP).

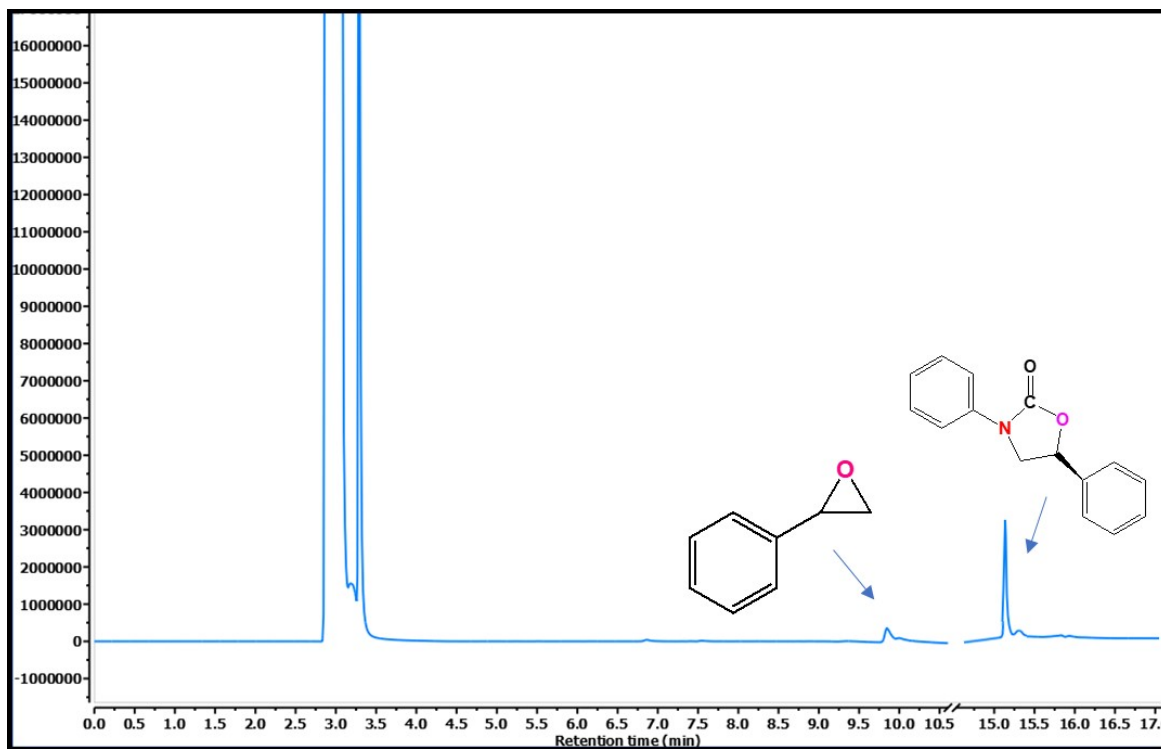

**Figure S35.** Chiral GC chromatogram for the oxazolidinone conversion through cycloaddition of CO<sub>2</sub> into styrene epoxide catalyzed by CMOF-801(ASP).

**Table S9.** Comparison of CMOF-801-(ASP) with other catalysts in oxazolidine formation reaction.

| <b>Entry</b> | <b>Catalyst</b> | <b>Temp<br/>p<br/>(°C)</b> | <b>Press<br/>(bar)</b> | <b>Time<br/>(hour)</b> | <b>Co-<br/>catalyst</b> | <b>Yield<br/>(%)</b> | <b>Ref.</b>          |
|--------------|-----------------|----------------------------|------------------------|------------------------|-------------------------|----------------------|----------------------|
| 1            | Ni-MOF          | 90                         | 1                      | 12                     | TBAI                    | 78                   | 11                   |
| 2            | UiO-66          | 85                         | 1                      | 12                     | -                       | 78                   | 12                   |
| 3            | MOF-801(P)      | 90                         | 1                      | 12                     | -                       | 7                    | <b>This<br/>work</b> |
| 4            | MOF-801(D)      | 90                         | 1                      | 12                     | -                       | 20                   | <b>This<br/>work</b> |
| 5            | CMOF-801(ASP)   | 90                         | 1                      | 12                     | -                       | 90                   | <b>This<br/>work</b> |

## References:

- (1) Wang, S.; Wahiduzzaman, M.; Davis, L.; Tissot, A.; Shepard, W.; Marrot, J.; Martineau-Corcoss, C.; Hamdane, D.; Maurin, G.; Devautour-Vinot, S. A Robust Zirconium Amino Acid Metal-Organic Framework for Proton Conduction. *Nature communications* **2018**, *9* (1), 1–8.
- (2) Zhao, H.; Yi, B.; Si, X.; Cao, L.; Su, L.; Wang, Y.; Chou, L.-Y.; Xie, J. Solid-State Synthesis of Defect-Rich Zr-Uio-66 Metal–Organic Framework Nanoparticles for the Catalytic Ring Opening of Epoxides with Alcohols. *ACS Applied Nano Materials* **2021**, *4* (9), 9752–9759.
- (3) Tanaka, K.; Otani, K. I.; Murase, T.; Nishihote, S.; Urbanczyk-Lipkowska, Z. Enantioselective Ring-Opening Reaction of Epoxides with MeOH Catalyzed by Homochiral Metal-Organic Framework. *Bulletin of the Chemical Society of Japan* **2012**, *85* (6), 709–714. <https://doi.org/10.1246/bcsj.20110392>.
- (4) Tanaka, K.; Otani, K. Asymmetric Alcoholic Kinetic Resolution of Styrene Oxide Catalysed by Chiral Metal–Organic Framework Crystals. *New Journal of Chemistry* **2010**, *34* (11), 2389–2391. <https://doi.org/10.1039/C0NJ00038H>.
- (5) Gharib, M.; Esrafil, L.; Morsali, A.; Retailleau, P. Solvent-Assisted Ligand Exchange (SALE) for the Enhancement of Epoxide Ring-Opening Reaction Catalysis Based on Three Amide-Functionalized Metal–Organic Frameworks. *Dalton Transactions* **2019**, *48* (24), 8803–8814.
- (6) Karmakar, A.; Guedes da Silva, M. F. C.; Pombeiro, A. J. L. Zinc Metal–Organic Frameworks: Efficient Catalysts for the Diastereoselective Henry Reaction and Transesterification. *Dalton Transactions* **2014**, *43* (21), 7795–7810. <https://doi.org/10.1039/C4DT00219A>.
- (7) Ugale, B.; Dhankhar, S. S.; Nagaraja, C. M. Construction of 3D Homochiral Metal–Organic Frameworks (MOFs) of Cd(II): Selective CO<sub>2</sub> Adsorption and Catalytic Properties for the Knoevenagel and Henry Reaction. *Inorganic Chemistry Frontiers* **2017**, *4* (2), 348–359. <https://doi.org/10.1039/C6QI00506C>.
- (8) Prestipino, C.; Regli, L.; Vitillo, J. G.; Bonino, F.; Damin, A.; Lamberti, C.; Zecchina, A.; Solari, P. L.; Kongshaug, K. O.; Bordiga, S. Local Structure of Framework Cu (II) in HKUST-1 Metallorganic Framework: Spectroscopic Characterization upon Activation and Interaction with Adsorbates. *Chemistry of materials* **2006**, *18* (5), 1337–1346.
- (9) Fan, Y.; Ren, Y.; Li, J.; Yue, C.; Jiang, H. Enhanced Activity and Enantioselectivity of Henry Reaction by the Postsynthetic Reduction Modification for a Chiral Cu(Salen)-Based Metal–Organic Framework. *Inorganic Chemistry* **2018**, *57* (19), 11986–11994. <https://doi.org/10.1021/acs.inorgchem.8b01551>.
- (10) Dutta, S.; Kumari, N.; Dubbu, S.; Jang, S. W.; Kumar, A.; Ohtsu, H.; Kim, J.; Cho, S. H.; Kawano, M.; Lee, I. S. Highly Mesoporous Metal-Organic Frameworks as Synergistic Multimodal Catalytic Platforms for Divergent Cascade Reactions. *Angewandte Chemie International Edition* **2020**, *59* (9), 3416–3422.



<https://doi.org/https://doi.org/10.1002/anie.201916578>.

- (11) Helal, A.; Fettouhi, M.; Arafat, M. E.; Khan, M. Y.; Sanhoob, M. A. Nickel Based Metal-Organic Framework as Catalyst for Chemical Fixation of CO<sub>2</sub> in Oxazolidinone Synthesis. *Journal of CO<sub>2</sub> Utilization* **2021**, *50*, 101603.
- (12) Helal, A.; Cordova, K. E.; Arafat, M. E.; Usman, M.; Yamani, Z. H. Defect-Engineering a Metal-Organic Framework for CO<sub>2</sub> fixation in the Synthesis of Bioactive Oxazolidinones. *Inorganic Chemistry Frontiers* **2020**, *7* (19), 3571–3577.  
<https://doi.org/10.1039/d0qi00496k>.
